# Supplementary material for: Photoorganocatalysed and visible light photoredox catalysed trifluoromethylation of olefins and (hetero)aromatics in batch and continuous flow
Source: Royal Society of Chemistry journal article supplement (doi:10.1039/c5cc09881e), 2016-01-01
Supplement: c5cc09881e1.pdf [file c5cc09881e1.pdf]

## Supporting Information

### Photoorganocatalyzed and visible light photoredox catalysed trifluoromethylation of olefins and (hetero)aromatics in batch and continuous flow

Quentin Lefebvre,<sup>¶\*</sup> Norbert Hoffmann<sup>§\*</sup> and Magnus Rueping<sup>¶\*</sup>

<sup>¶</sup>*Institute of Organic Chemistry, RWTH Aachen, Landoltweg 1, D-52074 Aachen, Germany.*

<sup>§</sup>*CNRS, Université de Reims Champagne-Ardenne, Institut de Chimie Moléculaire de Reims (UMR 6229), Equipe de Photochimie, UFR Sciences, B.P. 1039, 51687 Reims, France*

|                                                                                               |           |
|-----------------------------------------------------------------------------------------------|-----------|
| <b>1. General information</b> .....                                                           | <b>2</b>  |
| <b>2. Photoorganocatalysed trifluoromethylation</b> .....                                     | <b>3</b>  |
| <b>3. Reduction of 2a to 1-phenyl-3-(trifluoromethyl)pyrrolidine 3a</b> .....                 | <b>10</b> |
| <b>4. <sup>1</sup>H, <sup>13</sup>C and <sup>19</sup>F NMR spectra of new compounds</b> ..... | <b>11</b> |

## 1. General Information

All reactions were performed with oven-dried glassware and under an inert atmosphere (argon) unless otherwise stated.

Acetonitrile was distilled from calcium hydride and THF from benzophenone/solvona<sup>®</sup> prior to use. Other solvents were used as purchased unless otherwise stated. The loading of the reactions was performed on air.

Commercial reagents were used as purchased without further purification.

Organic solutions were concentrated under reduced pressure on a Büchi rotary evaporator. Chromatographic purification of products was carried out using Merck Kieselgel 60 silica gel (230-400 mesh). Thin-layer chromatography was carried out using Merck Kieselgel 60 F<sub>254</sub> (230-400 mesh) fluorescent treated silica and were visualized under UV light (250 nm) or by staining with aqueous potassium permanganate solutions.

<sup>1</sup>H NMR spectra were recorded in deuterated solvents on Bruker or Varian spectrometers at 300, 400 or 600 MHz, with residual protic solvent as the internal standard. <sup>13</sup>C NMR spectra were recorded in deuterated solvents on Bruker or Varian spectrometers at 75, 100 or 125 MHz, with the central peak of the deuterated solvent as the internal standard. <sup>19</sup>F NMR spectra were recorded in deuterated solvents on Bruker or Varian spectrometers at 376 or 564 MHz. Chemical shifts ( $\delta$ ) are given in parts per million (ppm), and coupling constants ( $J$ ) are given in Hertz (Hz) rounded to the nearest 0.1 Hz. The <sup>1</sup>H NMR spectra are reported as  $\delta$ /ppm downfield from tetramethylsilane (multiplicity, number of protons, assignment, coupling constant  $J$ /Hz). The <sup>13</sup>C NMR and <sup>19</sup>F NMR spectra are reported as  $\delta$ /ppm. Assignments are aided by the use of DEPT-135, COSY, HMQC and HMBC spectra where necessary. IR spectra were recorded on a Perkin Elmer Spectrum 100 spectrometer, only diagnostic absorbances ( $\lambda_{\text{max}}$ ) are reported. Low resolution mass spectra were recorded on a Finnigan SSQ 7000 mass spectrometer (EI). Melting points were recorded on a Büchi Melting Point M-565 apparatus, at ambient pressure and are uncorrected.

Non-commercial maleimide derivatives were prepared by condensation of the corresponding primary amines with maleic anhydride.

## 2. Photoorganocatalysed trifluoromethylation

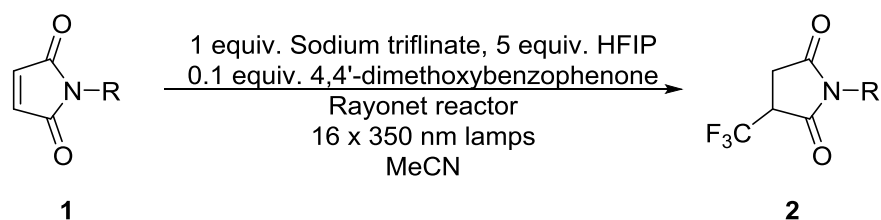

### General procedure in batch

In a dry pyrex tube under argon, sodium triflate (16 mg, 0.1 mmol, 1.0 equiv.), the maleimide derivative (0.1 mmol, 1.0 equiv.) and 4,4'-dimethoxybenzophenone (2.4 mg, 0.01 mmol, 0.1 equiv.) were dissolved in 5 mL of dry, degassed acetonitrile. HFIP (0.05 mL, 0.5 mmol, 5.0 equiv) was added to the solution. The milky solution was irradiated for 6 h, then evaporated and directly purified by column chromatography on silica gel eluting with a pentane/ethyl acetate mixture 10:1 to 4:1. For reactions on bigger scale, several experiments were conducted in parallel, and the reactions mixtures were combined prior purification.

The reaction under visible light was performed the same way, using a glass tube instead of a pyrex tube, and Ir[dF(CF<sub>3</sub>)ppy]<sub>2</sub>(dtbbpy)PF<sub>6</sub> (1.1 mg, 0.001 mmol, 0.01 equiv.) instead of 4,4'-dimethoxybenzophenone. Irradiation was performed with blue LEDs for 16-18 h.

### General procedure in flow

The photo-flow setup was constructed similarly to our previous report:<sup>1</sup> 8 glass rods (length 40 cm, diameter 0.5 cm) were mounted onto a wooden plate (21×21×1 cm), and a Rotilabo<sup>®</sup>-FEP-tube (10 m, inner diameter 0.8 mm, outer diameter 1.58 mm, volume 5.0 mL) was wrapped around the rods. One end was connected to a steel needle and the other end was hanged above a receiving flask. The wooden plate was placed onto a Rayonet reactor (RPR-200) equipped with 16 'black-light' lamps (8 W each, λ = 350 nm) with the rods inside the reactor.

In a dry round-bottom flask under argon, sodium triflate (16 mg, 0.1 mmol, 1.0 equiv.), the maleimide derivative (0.1 mmol, 1.0 equiv.) and 4,4'-dimethoxybenzophenone (2.4 mg, 0.01 mmol, 0.1 equiv.) were dissolved in 5 mL of dry, degassed acetonitrile. HFIP (0.05 mL, 0.5 mmol, 5.0 equiv) was added to the solution. The milky solution was transferred to a 5 mL syringe and pumped into the photo-flow setup *via* a syringe pump (the flow rate was adapted to the setup to maintain a 30 minute retention time). After all the solution was pumped into the system, dry, degassed acetonitrile was

<sup>1</sup> Q. Lefebvre, M. Jentsch, M. Rueping, *Beilstein J. Org. Chem.*, **2013**, 9, 1883-1890.

pumped with the same flow rate to flush the tubing. The collected solution was evaporated and directly purified by chromatography on silica gel eluting with a pentane/ethyl acetate mixture 10:1 to 4:1. For reactions on bigger scale, a bigger flask and a bigger syringe were used.

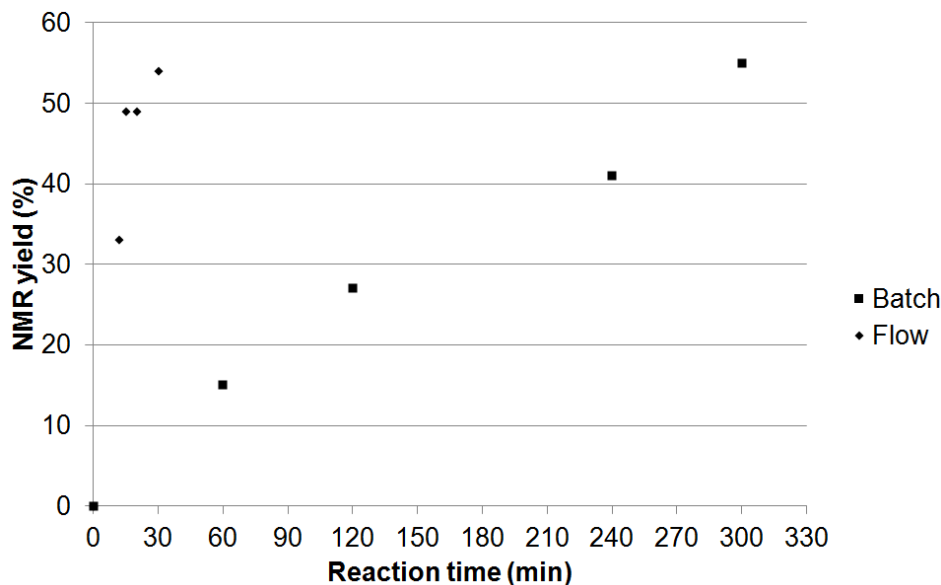

**Figure S1.** Comparison of the kinetic profiles of the trifluoromethylation of *N*-phenylmaleimide in batch and in flow.

### 1-phenyl-3-(trifluoromethyl)pyrrolidine-2,5-dione **2a**

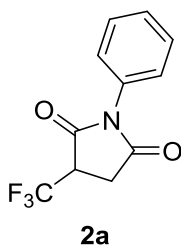

0.4 mmol scale, colourless solid, 59 mg, 61%. In flow: 0.2 mmol scale, 26 mg, 54%. Under visible light: 0.2 mmol scale, 30 mg, 62%.

**m.p.** 105-107 °C; **FT-IR**  $\nu_{\text{max}}$ (ATR) 2933  $\text{cm}^{-1}$ , 1710  $\text{cm}^{-1}$ , 1397  $\text{cm}^{-1}$ , 1190  $\text{cm}^{-1}$ , 1112  $\text{cm}^{-1}$ , 680  $\text{cm}^{-1}$ ;  **$^1\text{H}$  NMR** ( $\text{CDCl}_3$ , 400 MHz)  $\delta_{\text{H}}$  2.98 (dd, 1H,  $\text{CH}_a\text{H}_b$ ,  $J$  5.2, 18.6 Hz), 3.11 (dd, 1H,  $\text{CH}_a\text{H}_b$ ,  $J$  9.8, 18.6 Hz), 3.69 (ddq, 1H,  $\text{CH}$ ,  $J$  5.2, 9.8 Hz,  $J_F$  8.9 Hz), 7.23-7.26 (m, 2H,  $2 \times \text{Ar-CH}$ ), 7.40-7.50 (m, 3H,  $3 \times \text{Ar-CH}$ );  **$^{13}\text{C}$  NMR** ( $\text{CDCl}_3$ , 100 MHz)  $\delta_{\text{C}}$  29.7 (q,  $\text{CH}_2$ ,  $J_F$  2.0 Hz), 44.6 (q,  $\text{CH}$ ,  $J_F$  30.0 Hz), 123.9 (q,  $\text{CF}_3$ ,  $J_F$  279.0 Hz), 126.5 ( $2 \times \text{Ar-CH}$ ), 129.3 (Ar-CH), 129.5 ( $2 \times \text{Ar-CH}$ ), 131.2 ( $\text{C}_{\text{quat}}$ ), 168.8 (q,  $\text{CO}$ ,  $J_F$  3.0 Hz), 172.6 ( $\text{CO}$ );  **$^{19}\text{F}$  NMR** ( $\text{CDCl}_3$ , 376 MHz)  $\delta_{\text{F}}$  -68.82 (d,  $\text{CF}_3$ ,  $J_H$  8.9 Hz);  **$m/z$**  (EI) 243 ( $[\text{M}]^{+\bullet}$ , 33%), 174 ( $[\text{M} - \text{CF}_3]^+$ , 100%). **HRMS** (ESI): calc. for  $[\text{C}_{11}\text{H}_8\text{O}_2\text{NF}_3\text{Na}]$  266.0399, measured 266.0402.

### 1-(*p*-chlorophenyl)-3-(trifluoromethyl)pyrrolidine-2,5-dione **2b**

0.4 mmol scale, colourless solid, 43 mg, 39%. In flow: 0.2 mmol scale, 26 mg, 47%. Under visible light: 0.2 mmol scale, 30 mg, 54%.

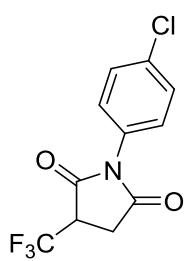

**2b**

**m.p.** 120-122 °C; **FT-IR**  $\nu_{\text{max}}$ (ATR) 2956  $\text{cm}^{-1}$ , 1712  $\text{cm}^{-1}$ , 142  $\text{cm}^{-1}$ , 1398  $\text{cm}^{-1}$ , 1190  $\text{cm}^{-1}$ , 1110  $\text{cm}^{-1}$ , 955  $\text{cm}^{-1}$ , 818  $\text{cm}^{-1}$ ;  **$^1\text{H NMR}$**  ( $\text{CDCl}_3$ , 600 MHz)  $\delta_{\text{H}}$  3.03 (dd, 1H,  $\text{CH}_a\text{H}_b$ ,  $J$  5.0, 18.7 Hz), 3.16 (dd, 1H,  $\text{CH}_a\text{H}_b$ ,  $J$  10.0, 18.7 Hz), 3.73 (ddq, 1H,  $\text{CH}$ ,  $J$  5.0, 10.0 Hz,  $J_F$  8.8 Hz), 7.24 (d, 2H,  $2 \times \text{Ar-CH}$ ,  $J$  8.7 Hz), 7.46 (d, 2H,  $2 \times \text{Ar-CH}$ ,  $J$  8.7 Hz);  **$^{13}\text{C NMR}$**  ( $\text{CDCl}_3$ , 125 MHz)  $\delta_{\text{C}}$  29.7 (q,  $\text{CH}_2$ ,  $J_F$  1.7 Hz), 44.7 (q,  $\text{CH}$ ,  $J_F$  30.2 Hz), 123.8 (q,  $\text{CF}_3$ ,  $J_F$  279.0 Hz), 127.7 ( $2 \times \text{Ar-CH}$ ), 129.6 ( $\text{C}_{\text{quat}}$ ), 129.7 ( $2 \times \text{Ar-CH}$ ), 135.3 ( $\text{C}_{\text{quat}}$ ), 168.5 (q,  $\text{CO}$ ,  $J_F$  2.7 Hz), 172.2 ( $\text{CO}$ );  **$^{19}\text{F NMR}$**  ( $\text{CDCl}_3$ , 564 MHz)  $\delta_{\text{F}}$  -68.78 (d,  $\text{CF}_3$ ,  $J_H$  8.8 Hz);  **$m/z$**  (EI) 279 ( $[\text{M}]^{+\bullet}$ , 34%), 277 ( $[\text{M}]^{+\bullet}$ , 100%), 208 ( $[\text{M} - \text{CF}_3]^+$ , 25%). **HRMS** (ESI): calc. for  $[\text{C}_{11}\text{H}_7\text{O}_2\text{NClF}_3\text{Na}]$  300.0015, measured 300.0010.

### 1-(*m*-bromophenyl)-3-(trifluoromethyl)pyrrolidine-2,5-dione **2c**

0.3 mmol scale, colourless solid, 45 mg, 47%.

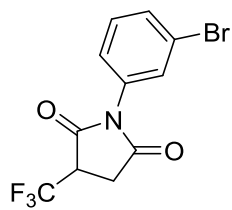

**2c**

**m.p.** 95-97 °C; **FT-IR**  $\nu_{\text{max}}$ (ATR) 2930  $\text{cm}^{-1}$ , 1712  $\text{cm}^{-1}$ , 1385  $\text{cm}^{-1}$ , 1184  $\text{cm}^{-1}$ , 1115  $\text{cm}^{-1}$ , 952  $\text{cm}^{-1}$ , 677  $\text{cm}^{-1}$ ;  **$^1\text{H NMR}$**  ( $\text{CDCl}_3$ , 400 MHz)  $\delta_{\text{H}}$  3.04 (dd, 1H,  $\text{CH}_a\text{H}_b$ ,  $J$  5.1, 18.7 Hz), 3.17 (dd, 1H,  $\text{CH}_a\text{H}_b$ ,  $J$  9.8, 18.7 Hz), 3.69 (ddq, 1H,  $\text{CH}$ ,  $J$  5.1, 9.8 Hz,  $J_F$  8.8 Hz), 7.24-7.27 (m, 1H,  $\text{Ar-CH}$ ), 7.37 (t, 1H,  $\text{Ar-CH}$ ,  $J$  8.0 Hz), 7.48 (t, 1H,  $\text{Ar-CH}$ ,  $J$  1.9 Hz), 7.56-7.59 (m, 1H,  $\text{Ar-CH}$ );  **$^{13}\text{C NMR}$**  ( $\text{CDCl}_3$ , 100 MHz)  $\delta_{\text{C}}$  29.7 (q,  $\text{CH}_2$ ,  $J_F$  1.6 Hz), 44.7 (q,  $\text{CH}$ ,  $J_F$  30.1 Hz), 122.8 ( $\text{C}_{\text{quat}}$ ), 123.8 (q,  $\text{CF}_3$ ,  $J_F$  279.0 Hz), 125.1 ( $\text{Ar-CH}$ ), 129.6 ( $\text{Ar-CH}$ ), 130.7 ( $\text{Ar-CH}$ ), 132.3 ( $\text{C}_{\text{quat}}$ ), 132.5 ( $\text{Ar-CH}$ ), 168.3 (q,  $\text{CO}$ ,  $J_F$  2.7 Hz), 172.0 ( $\text{CO}$ );  **$^{19}\text{F NMR}$**  ( $\text{CDCl}_3$ , 376 MHz)  $\delta_{\text{F}}$  -68.78 (d,  $\text{CF}_3$ ,  $J_H$  8.8 Hz);  **$m/z$**  (EI) 323 ( $[\text{M}]^{+\bullet}$ , 97%), 321 ( $[\text{M}]^{+\bullet}$ , 100%), 254 ( $[\text{M} - \text{CF}_3]^+$ , 25%), 252 ( $[\text{M} - \text{CF}_3]^+$ , 25%). **HRMS** (ESI): calc. for  $[\text{C}_{11}\text{H}_7\text{O}_2\text{NBrF}_3\text{Na}]$  343.9505, measured 343.9506.

### 1-(*o*-tolyl)-3-(trifluoromethyl)pyrrolidine-2,5-dione **2d**

0.4 mmol scale, yellow solid, ~1.5:1 mixture of two diastereomers, 63 mg, 61%. Under visible light:  
0.2 mmol scale, 34 mg, 66%.

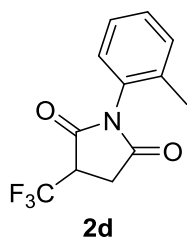

**m.p.** 70-72 °C; **FT-IR**  $\nu_{\max}$ (ATR) 2959  $\text{cm}^{-1}$ , 1717  $\text{cm}^{-1}$ , 1373  $\text{cm}^{-1}$ , 1187  $\text{cm}^{-1}$ , 1115  $\text{cm}^{-1}$ , 955  $\text{cm}^{-1}$ , 674  $\text{cm}^{-1}$ ;  **$^1\text{H}$  NMR** ( $\text{CDCl}_3$ , 400 MHz)  $\delta_{\text{H}}$  2.13 (s, 6H, 2  $\times$   $\underline{\text{CH}_3}$ ), 2.98-3.04 (m, 2H, 2  $\times$   $\underline{\text{CH}_a\text{H}_b}$ ), 3.08-3.19 (m, 2H, 2  $\times$   $\underline{\text{CH}_a\text{H}_b}$ ), 3.63-3.80 (m, 2H, 2  $\times$   $\underline{\text{CH}}$ ), 7.03-7.07 (m, 2H, 2  $\times$  Ar- $\underline{\text{CH}}$ ), 7.28-7.40 (m, 6H, 6  $\times$  Ar- $\underline{\text{CH}}$ );  **$^{13}\text{C}$  NMR** ( $\text{CDCl}_3$ , 100 MHz)  $\delta_{\text{C}}$  17.4 (major  $\underline{\text{CH}_3}$ ), 17.7 (minor  $\underline{\text{CH}_3}$ ), 29.8 (2  $\times$   $\underline{\text{CH}_2}$ ), 44.3-45.3 (m, 2  $\times$   $\underline{\text{CH}}$ ), 119.8-128.1 (m, 2  $\times$   $\underline{\text{CF}_3}$ ), 127.2 (major Ar- $\underline{\text{CH}}$ ), 127.3 (minor Ar- $\underline{\text{CH}}$ ), 127.8 (major Ar- $\underline{\text{CH}}$ ), 128.0 (minor Ar- $\underline{\text{CH}}$ ), 130.2 (major Ar- $\underline{\text{CH}}$ ), 130.2 (minor Ar- $\underline{\text{CH}}$ ), 130.3 (2  $\times$   $\underline{\text{C}}_{\text{quat.}}$ ), 131.4 (minor Ar- $\underline{\text{CH}}$ ), 131.5 (major Ar- $\underline{\text{CH}}$ ), 135.5 (minor  $\underline{\text{C}}_{\text{quat.}}$ ), 135.9 (major  $\underline{\text{C}}_{\text{quat.}}$ ), 168.7 (2  $\times$   $\underline{\text{CO}}$ ), 172.5 (minor  $\underline{\text{CO}}$ ), 172.7 (major  $\underline{\text{CO}}$ );  **$^{19}\text{F}$  NMR** ( $\text{CDCl}_3$ , 376 MHz)  $\delta_{\text{F}}$  -68.91-68.86 (m, 2  $\times$   $\underline{\text{CF}_3}$ );  **$m/z$**  (EI) 257 ( $[\text{M}]^{+\bullet}$ , 5%), 188 ( $[\text{M} - \text{CF}_3]^+$ , 20%). **HRMS** (ESI): calc. for  $[\text{C}_{12}\text{H}_{10}\text{O}_2\text{NF}_3\text{Na}]$  280.0556, measured 280.0556.

### 1-(*o*-trifluoromethylphenyl)-3-(trifluoromethyl)pyrrolidine-2,5-dione **2e**

0.4 mmol scale, yellow solid, 2:1 mixture of two diastereomers, 61 mg, 49%.

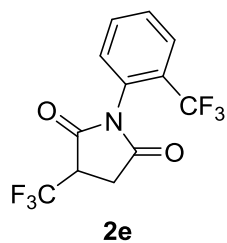

**m.p.** 72-74 °C; **FT-IR**  $\nu_{\max}$ (ATR) 3397  $\text{cm}^{-1}$ , 2926  $\text{cm}^{-1}$ , 2660  $\text{cm}^{-1}$ , 2309  $\text{cm}^{-1}$ , 2094  $\text{cm}^{-1}$ , 1892  $\text{cm}^{-1}$ , 1730  $\text{cm}^{-1}$ , 1188  $\text{cm}^{-1}$ , 1123  $\text{cm}^{-1}$ ;  **$^1\text{H}$  NMR** ( $\text{CDCl}_3$ , 600 MHz)  $\delta_{\text{H}}$  3.04 (dd, 1H,  $\underline{\text{CH}_a\text{H}_b}$ ,  $J$  4.9, 19.1 Hz), 3.08-3.15 (m, 2H,  $\underline{\text{CH}_a\text{H}_b}$  &  $\underline{\text{CH}_a\text{H}_b}$ ), 3.22 (dd, 1H,  $\underline{\text{CH}_a\text{H}_b}$ ,  $J$  10.1, 18.7 Hz), 3.69-3.76 (m, 1H,  $\underline{\text{CH}}$ ), 3.78-3.84 (m, 1H,  $\underline{\text{CH}}$ ), 7.20 (d, 1H, Ar- $\underline{\text{CH}}$ ,  $J$  7.8 Hz), 7.24 (d, 1H, Ar- $\underline{\text{CH}}$ ,  $J$  7.8 Hz), 7.62-7.73 (m, 4H, 4  $\times$  Ar- $\underline{\text{CH}}$ ), 7.82-7.83 (m, 2H, 2  $\times$  Ar- $\underline{\text{CH}}$ );  **$^{13}\text{C}$  NMR** ( $\text{CDCl}_3$ , 125 MHz)  $\delta_{\text{C}}$  29.9-30.0 (m, 2  $\times$   $\underline{\text{CH}_2}$ ), 44.9 (q,  $\underline{\text{CH}}$ ,  $J_{\text{F}}$  30.1 Hz), 45.0 (q,  $\underline{\text{CH}}$ ,  $J_{\text{F}}$  30.5 Hz), 122.7 (q,  $\underline{\text{CF}_3}$ ,  $J_{\text{F}}$  273.0 Hz), 122.9 (q,  $\underline{\text{CF}_3}$ ,  $J_{\text{F}}$  273.4 Hz), 123.7 (q,  $\underline{\text{CF}_3}$ ,  $J_{\text{F}}$  278.9 Hz), 123.8 (q,  $\underline{\text{CF}_3}$ ,  $J_{\text{F}}$  278.9 Hz), 127.8-127.9 (m, 2  $\times$   $\underline{\text{C}}_{\text{quat.}}$ ), 128.5 (q, Ar- $\underline{\text{CH}}$ ,  $J_{\text{F}}$  31.4 Hz), 128.9 (q, Ar- $\underline{\text{CH}}$ ,  $J_{\text{F}}$  31.8 Hz), 129.3-129.4 (m, 2  $\times$   $\underline{\text{C}}_{\text{quat.}}$ ), 130.6 (Ar- $\underline{\text{CH}}$ ), 130.7 (Ar- $\underline{\text{CH}}$ ), 130.8 (Ar- $\underline{\text{CH}}$ ), 130.9 (Ar- $\underline{\text{CH}}$ ), 133.5 (Ar- $\underline{\text{CH}}$ ), 133.7 (Ar- $\underline{\text{CH}}$ ), 168.3-168.4 (m, 2  $\times$   $\underline{\text{CO}}$ ), 172.2 ( $\underline{\text{CO}}$ ), 172.3 ( $\underline{\text{CO}}$ );  **$^{19}\text{F}$  NMR** ( $\text{CDCl}_3$ , 376 MHz)  $\delta_{\text{F}}$  -68.9 (d,  $\underline{\text{CF}_3}$ ,  $J_{\text{H}}$  8.7 Hz), -68.8-68.7 (m,  $\underline{\text{CF}_3}$ ), -61.7 (d,  $\underline{\text{CF}_3}$ ,  $J_{\text{H}}$  2.6 Hz), -61.33 (s,  $\underline{\text{CF}_3}$ );  **$m/z$**  (EI) 311 ( $[\text{M}]^{+\bullet}$ , 5%), 242 ( $[\text{M} - \text{CF}_3]^+$ , 5%). **HRMS** (ESI): calc. for  $[\text{C}_{12}\text{H}_7\text{O}_2\text{NF}_6\text{Na}]$  334.0279, measured 334.0273.

## Methyl *o*-(2,5-dioxo-3-(trifluoromethyl)pyrrolidin-1-yl)benzoate **2f**

0.4 mmol scale, yellow oil, 2:1 mixture of two diastereomers, 58 mg, 48%.

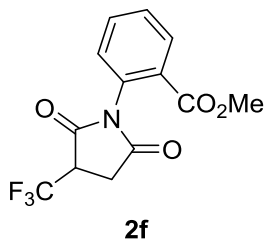

**FT-IR**  $\nu_{\max}$ (ATR) 2953  $\text{cm}^{-1}$ , 1717  $\text{cm}^{-1}$ , 1264  $\text{cm}^{-1}$ , 1186  $\text{cm}^{-1}$ , 1115  $\text{cm}^{-1}$ , 955  $\text{cm}^{-1}$ , 685  $\text{cm}^{-1}$ ;  **$^1\text{H}$  NMR** ( $\text{CDCl}_3$ , 400 MHz)  $\delta_{\text{H}}$  3.00-3.15 (m, 2H,  $\underline{\text{CH}_2}$ ), 3.77-3.89 (m, 4H,  $\underline{\text{CH}_3}$  &  $\underline{\text{CH}}$ ), 7.19-7.28 (m, 1H, Ar- $\underline{\text{CH}}$ ), 7.53-7.57 (m, 1H, Ar- $\underline{\text{CH}}$ ), 7.64-7.70 (m, 1H, Ar- $\underline{\text{CH}}$ ), 8.15-8.17 (m, 1H, Ar- $\underline{\text{CH}}$ );  **$^{13}\text{C}$  NMR** ( $\text{CDCl}_3$ , 100 MHz)  $\delta_{\text{C}}$  30.1 ( $\underline{\text{CH}_2}$ ), 45.2 (q,  $\underline{\text{CH}}$ ,  $J_{\text{F}}$  30.5), 52.6 ( $\underline{\text{CH}_3}$ ), 128.0 (q,  $\underline{\text{CF}_3}$ ,  $J_{\text{F}}$  283.2 Hz), 130.1 (2  $\times$  Ar- $\underline{\text{CH}}$ ), 132.0 (Ar- $\underline{\text{CH}}$ ), 133.6 (2  $\times$   $\underline{\text{C}}_{\text{quat}}$ ), 134.0 (Ar- $\underline{\text{CH}}$ ), 164.9 ( $\underline{\text{CO}_2}$ ), 169.2 ( $\underline{\text{CO}}$ ), 173.1 ( $\underline{\text{CO}}$ );  **$^{19}\text{F}$  NMR** ( $\text{CDCl}_3$ , 376 MHz)  $\delta_{\text{F}}$  - 68.68 (d,  $\underline{\text{CF}_3}$ ,  $J$  8.9 Hz), - 67.90 (d,  $\underline{\text{CF}_3}$ ,  $J$  8.2 Hz);  **$m/z$**  (EI) 301 ( $[\text{M}]^{+\bullet}$ , 100%), 270 ( $[\text{M} - \text{OCH}_3]^+$ , 95%), 200 ( $[\text{M} - \text{CF}_3 - \text{HOCH}_3]^+$ , 35%). **HRMS** (ESI): calc. for  $[\text{C}_{13}\text{H}_{10}\text{O}_4\text{NF}_3\text{Na}]$  324.0454, measured 324.0455.

## 1-(*o*-methoxyphenyl)-3-(trifluoromethyl)pyrrolidine-2,5-dione **2g**

0.4 mmol scale, yellow oil, 1:1 mixture of diastereomers, 30 mg, 28%. In flow: 0.2 mmol scale, 27 mg, 49%.

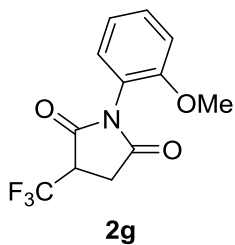

**FT-IR**  $\nu_{\max}$ (ATR) 2953  $\text{cm}^{-1}$ , 1717  $\text{cm}^{-1}$ , 1264  $\text{cm}^{-1}$ , 1186  $\text{cm}^{-1}$ , 1115  $\text{cm}^{-1}$ , 955  $\text{cm}^{-1}$ , 685  $\text{cm}^{-1}$ ;  **$^1\text{H}$  NMR** ( $\text{CDCl}_3$ , 600 MHz)  $\delta_{\text{H}}$  2.99-3.05 (m, 2H, 2  $\times$   $\underline{\text{CH}_a\text{H}_b}$ ), 3.12 (dd, 1H,  $\underline{\text{CH}_a\text{H}_b}$ ,  $J$  9.7, 18.6 Hz), 3.18 (dd, 1H,  $\underline{\text{CH}_a\text{H}_b}$ ,  $J$  10.1, 18.5 Hz), 3.66-3.73 (m, 1H,  $\underline{\text{CH}}$ ), 3.75-3.80 (m, 1H,  $\underline{\text{CH}}$ ), 3.79 (s, 3H,  $\underline{\text{CH}_3}$ ), 3.80 (s, 3H,  $\underline{\text{CH}_3}$ ), 7.02-7.07 (m, 4H, 4  $\times$  Ar- $\underline{\text{CH}}$ ), 7.10-7.14 (m, 2H, 2  $\times$  Ar- $\underline{\text{CH}}$ ), 7.42-7.45 (m, 2H, 2  $\times$  Ar- $\underline{\text{CH}}$ );  **$^{13}\text{C}$  NMR** ( $\text{CDCl}_3$ , 125 MHz)  $\delta_{\text{C}}$  29.9 (s, 2  $\times$   $\underline{\text{CH}_2}$ ), 44.8 (q, 2  $\times$   $\underline{\text{CH}}$ ,  $J_{\text{F}}$  29.9 Hz), 55.9 ( $\underline{\text{CH}_3}$ ), 56.0 ( $\underline{\text{CH}_3}$ ), 112.3 (Ar- $\underline{\text{CH}}$ ), 112.4 (Ar- $\underline{\text{CH}}$ ), 119.8 ( $\underline{\text{C}}_{\text{quat}}$ ), 120.0 ( $\underline{\text{C}}_{\text{quat}}$ ), 121.0 (Ar- $\underline{\text{CH}}$ ), 121.2 (Ar- $\underline{\text{CH}}$ ), 123.9 (q, 2  $\times$   $\underline{\text{CF}_3}$ ,  $J_{\text{F}}$  279.0 Hz), 128.9 (Ar- $\underline{\text{CH}}$ ), 129.2 (Ar- $\underline{\text{CH}}$ ), 131.4 (Ar- $\underline{\text{CH}}$ ), 131.5 (Ar- $\underline{\text{CH}}$ ), 154.5 ( $\underline{\text{C}}_{\text{quat}}$ ), 154.7 ( $\underline{\text{C}}_{\text{quat}}$ ), 168.5 ( $\underline{\text{CO}}$ ), 168.7 ( $\underline{\text{CO}}$ ), 172.4 ( $\underline{\text{CO}}$ ), 172.7 ( $\underline{\text{CO}}$ );  **$^{19}\text{F}$  NMR** ( $\text{CDCl}_3$ , 564 MHz)  $\delta_{\text{F}}$  - 68.89 (d,  $\underline{\text{CF}_3}$ ,  $J_{\text{H}}$  8.9 Hz), - 68.83 (d,  $\underline{\text{CF}_3}$ ,  $J_{\text{H}}$  8.9 Hz);  **$m/z$**  (EI) 301 ( $[\text{M}]^{+\bullet}$ , 100%), 270 ( $[\text{M} - \text{OCH}_3]^+$ , 95%), 200 ( $[\text{M} - \text{CF}_3 - \text{HOCH}_3]^+$ , 35%). **HRMS** (ESI): calc. for  $[\text{C}_{12}\text{H}_{10}\text{O}_3\text{NF}_3]$  273.0607, measured 273.0608.

### 1-methyl-3-(trifluoromethyl)pyrrolidine-2,5-dione **2h**

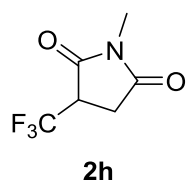

0.1 mmol scale, directly analyzed by  $^1\text{H}$  and  $^{19}\text{F}$  NMR, 52%. Analytical data in accordance with literature.<sup>2</sup>

### 1-butyl-3-(trifluoromethyl)pyrrolidine-2,5-dione **2i**

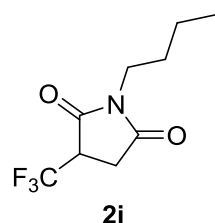

**FT-IR**  $\nu_{\text{max}}$ (ATR) 2960  $\text{cm}^{-1}$ , 1708  $\text{cm}^{-1}$ , 1351  $\text{cm}^{-1}$ , 1253  $\text{cm}^{-1}$ , 1188  $\text{cm}^{-1}$ , 1115  $\text{cm}^{-1}$ , 961  $\text{cm}^{-1}$ , 981  $\text{cm}^{-1}$ ;  **$^1\text{H}$  NMR** ( $\text{CDCl}_3$ , 600 MHz)  $\delta_{\text{H}}$  0.92 (t, 3H,  $\text{CH}_3$ ,  $J$  7.4 Hz), 1.27-1.33 (m, 2H,  $\text{CH}_2$ ), 1.54-1.59 (m, 2H,  $\text{CH}_2$ ), 2.84 (dd, 1H,  $\text{CH}_a\text{H}_b$ ,  $J$  4.8, 18.5 Hz), 2.96 (dd, 1H,  $\text{CH}_a\text{H}_b$ ,  $J$  9.8, 18.5 Hz), 3.51-3.57 (m, 3H,  $\text{CH}_2$  &  $\text{CH}$ );  **$^{13}\text{C}$  NMR** ( $\text{CDCl}_3$ , 125 MHz)  $\delta_{\text{C}}$  13.7 ( $\text{CH}_3$ ), 20.0 ( $\text{CH}_2$ ), 29.6 ( $2 \times \text{CH}_2$ ), 39.5 ( $\text{CH}_2$ ), 44.5 (q,  $\text{CH}$ ,  $J_{\text{F}}$  29.9 Hz), 123.9 (q,  $\text{CF}_3$ ,  $J_{\text{F}}$  278.7 Hz), 169.7 (q,  $\text{CO}$ ,  $J_{\text{F}}$  2.8 Hz), 173.6 ( $\text{CO}$ );  **$^{19}\text{F}$  NMR** ( $\text{CDCl}_3$ , 564 MHz)  $\delta_{\text{F}}$  -69.00 (d,  $\text{CF}_3$ ,  $J_{\text{H}}$  8.9 Hz);  **$m/z$**  (EI) 224 ( $[\text{M} + \text{H}]^+$ , 35%), 223 ( $[\text{M}]^{*+}$ , 25%), 181 ( $[\text{M} - \text{C}_3\text{H}_7 + \text{H}]^+$ , 50%), 168 ( $[\text{M} - \text{C}_4\text{H}_9 + \text{H}_2]^+$ , 100%).

### 1-benzyl-3-(trifluoromethyl)pyrrolidine-2,5-dione **2j**

0.1 mmol scale, directly analyzed by  $^1\text{H}$  and  $^{19}\text{F}$  NMR, 55%. The reaction was repeated on 0.4 mmol scale, colourless oil, 42 mg, 41%. Under visible light: 0.2 mmol scale, 32 mg, 62%.

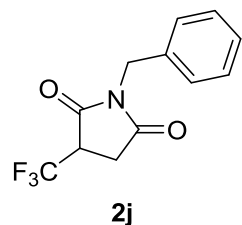

**FT-IR**  $\nu_{\text{max}}$ (ATR) 2958  $\text{cm}^{-1}$ , 1710  $\text{cm}^{-1}$ , 1346  $\text{cm}^{-1}$ , 1253  $\text{cm}^{-1}$ , 1173  $\text{cm}^{-1}$ , 688  $\text{cm}^{-1}$ ;  **$^1\text{H}$  NMR** ( $\text{CDCl}_3$ , 400 MHz)  $\delta_{\text{H}}$  2.84 (dd, 1H,  $\text{CH}_a\text{H}_b$ ,  $J$  5.1, 18.6 Hz), 2.96 (dd, 1H,  $\text{CH}_a\text{H}_b$ ,  $J$  9.7, 18.6 Hz), 3.55 (ddq, 1H,  $\text{CH}$ ,  $J$  5.1, 9.7 Hz,  $J_{\text{F}}$  8.9 Hz), 4.64-4.73 (m, 2H,  $\text{CH}_2$ ), 7.28-7.36 (m, 5H,  $5 \times \text{Ar-CH}$ );  **$^{13}\text{C}$  NMR** ( $\text{CDCl}_3$ , 100 MHz)  $\delta_{\text{C}}$  29.6 (q,  $\text{CH}_2$ ,  $J_{\text{F}}$  2.1 Hz), 43.2 ( $\text{CH}_2$ ), 44.5 (q,  $\text{CH}$ ,  $J_{\text{F}}$  30.0 Hz), 123.8 (q,  $\text{CF}_3$ ,  $J_{\text{F}}$  278.8 Hz), 128.4 (Ar- $\text{CH}$ ), 128.8 ( $2 \times \text{Ar-CH}$ ), 128.9 ( $2 \times \text{Ar-CH}$ ), 135.0 ( $\text{C}_{\text{quat}}$ ), 169.5 (q,  $\text{CO}$ ,  $J_{\text{F}}$  3.0 Hz), 173.2 ( $\text{CO}$ );  **$^{19}\text{F}$  NMR** ( $\text{CDCl}_3$ , 376 MHz)  $\delta_{\text{F}}$  -68.83 (d,  $\text{CF}_3$ ,  $J_{\text{H}}$  8.9 Hz);  **$m/z$**  (EI) 257 ( $[\text{M}]^{*+}$ , 100%). **HRMS** (ESI): calc. for  $[\text{C}_{12}\text{H}_{10}\text{O}_2\text{NF}_3\text{Na}]$  280.0550, measured 280.0556.

<sup>2</sup> C. Brulé, J.-P. Bouillon, C. Portella, *Tetrahedron*, **2004**, 60, 9849-9855.



### 1-cyclohexyl-3-(trifluoromethyl)pyrrolidine-2,5-dione **2k**

0.4 mmol scale, analyzed by  $^1\text{H}$  and  $^{19}\text{F}$  NMR, 41%. Isolated along with 10% of 4,4'-dimethoxybenzophenone. Under visible light: 0.2 mmol scale, 30 mg, 60%.

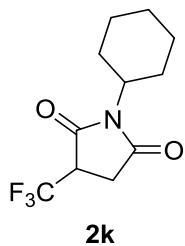

**FT-IR**  $\nu_{\text{max}}$ (ATR) 2923  $\text{cm}^{-1}$ , 1458  $\text{cm}^{-1}$ , 1067  $\text{cm}^{-1}$ , 803  $\text{cm}^{-1}$ ;  **$^1\text{H}$  NMR** ( $\text{CDCl}_3$ , 600 MHz)  $\delta_{\text{H}}$  1.16-1.34 (m, 3H), 1.58 (d, 2H,  $\underline{\text{CH}_2}$ ,  $J$  10.8 Hz), 1.65 (d, 1H,  $J$  12.8 Hz), 1.83 (d, 2H,  $\underline{\text{CH}_2}$ ,  $J$  13.5 Hz), 2.11 (m, 2H,  $\underline{\text{CH}_2}$ ), 2.78 (dd, 1H,  $\underline{\text{CH}_a\text{H}_b}$ ,  $J$  4.8, 18.5 Hz), 2.91 (dd, 1H,  $\underline{\text{CH}_a\text{H}_b}$ ,  $J$  9.9, 18.5 Hz), 3.48 (ddq, 1H,  $\underline{\text{CH}}$ ,  $J$  4.8, 9.9 Hz,  $J_{\text{F}}$  8.9 Hz), 3.99 (tt, 1H,  $\underline{\text{CH}}$ ,  $J$  3.8, 12.4 Hz);  **$^{13}\text{C}$  NMR** ( $\text{CDCl}_3$ , 125 MHz)  $\delta_{\text{C}}$  25.0 ( $\underline{\text{CH}_2}$ ), 25.8 ( $\underline{\text{CH}_2}$ ), 25.9 ( $\underline{\text{CH}_2}$ ), 28.7 ( $\underline{\text{CH}_2}$ ), 28.7 ( $\underline{\text{CH}_2}$ ), 29.5 (q,  $\underline{\text{CH}_2}$ ,  $J_{\text{F}}$  1.7 Hz), 44.2 (q,  $\underline{\text{CH}}$ ,  $J_{\text{F}}$  29.7 Hz), 55.59 ( $\underline{\text{CH}}$ ), 124.0 (q,  $\underline{\text{CF}_3}$ ,  $J_{\text{F}}$  278.8 Hz), 169.7 (q,  $\underline{\text{CO}}$ ,  $J_{\text{F}}$  2.6 Hz), 173.6 ( $\underline{\text{CO}}$ );  **$^{19}\text{F}$  NMR** ( $\text{CDCl}_3$ , 564 MHz)  $\delta_{\text{F}}$  -69.20 (d,  $\underline{\text{CF}_3}$ ,  $J_{\text{H}}$  8.9 Hz);  **$m/z$**  (EI) 244 ( $[\text{M} - 5]^+$ , 35%), 227 ( $[\text{M} - 12]^+$ , 35%).

### 3-(trifluoromethyl)dihydrofuran-2,5-dione **2l**

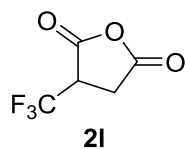

Reaction performed starting from maleic anhydride. 0.1 mmol scale, analyzed by  $^1\text{H}$  and  $^{19}\text{F}$  NMR, 48%. The product could not be isolated, but condensation of the crude product with aniline and comparison of the NMR with authentic **2a** confirmed the identity of the product.

### Dimethyl 2-(trifluoromethyl)succinate **2m**

Reaction performed starting from dimethyl maleate. 0.1 mmol scale, analyzed by  $^1\text{H}$  and  $^{19}\text{F}$  NMR, 51%. Analytical data in accordance with literature.<sup>3</sup>

### 1,3-Dimethyl-5-(trifluoromethyl)pyrimidine-2,4(1*H*,3*H*)-dione **2n**

0.2 mmol scale (3 equiv. sulfinate, 14 h irradiation), white solid, 20 mg, 48%. Under visible light: 0.2 mmol scale (3 equiv. sulfinate), 30 mg, 72%. Analytical data in accordance with literature.<sup>4</sup>

<sup>3</sup> C. Botteghi, C. Lando, U. Matteoli, S. Paganelli, G. Menchi, *J. Fluorine Chem.*, **1997**, 83, 67-71

## 2-Phenyl-3-(trifluoromethyl)imidazo[1,2-*a*]pyridine 2o

0.2 mmol scale (3 equiv. sulfinate, 6 h irradiation), white solid, 22 mg, 42%. Analytical data in accordance with literature.<sup>5</sup>

## 1,3,5-trimethoxy-2-(trifluoromethyl)benzene 2p

0.4 mmol scale (2 equiv. sulfinate, 6 h irradiation), white solid, 66 mg, 70%. Analytical data in accordance with literature.<sup>6</sup>

### Reduction of 2a to 1-phenyl-3-(trifluoromethyl)pyrrolidine 3a

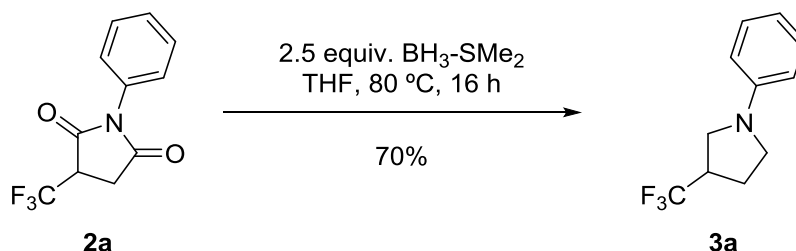

**2a** (24 mg, 0.1 mmol, 1.0 equiv.) was dissolved in 1 mL of dry THF in an oven-dried tube.  $\text{BH}_3\text{-SMe}_2$  (2 M solution in THF, 0.125 mL, 0.25 mmol, 2.5 equiv) was added dropwise, the tube was sealed with a screw-cap and the solution was stirred at 80 °C for 16 h. The mixture was carefully quenched by addition of 1 mL of 2 M aqueous NaOH, extracted with diethyl ether and washed with brine. The combined organics were concentrated *in vacuo*. The residue was purified by column chromatography on silica gel eluting with pentane to give the product as a colourless oil (15 mg, 70%).

**FT-IR**  $\nu_{\text{max}}$ (ATR) 2920  $\text{cm}^{-1}$ , 2854  $\text{cm}^{-1}$ , 1600  $\text{cm}^{-1}$ , 1505  $\text{cm}^{-1}$ , 1375  $\text{cm}^{-1}$ , 1339  $\text{cm}^{-1}$ , 1271  $\text{cm}^{-1}$ , 1131  $\text{cm}^{-1}$ , 1068  $\text{cm}^{-1}$ , 747  $\text{cm}^{-1}$ , 689  $\text{cm}^{-1}$ ; **<sup>1</sup>H NMR** ( $\text{CDCl}_3$ , 600 MHz)  $\delta_{\text{H}}$  2.18-2.24 (m, 1H,  $\text{CH}_a\text{H}_b$ ), 2.26-2.31 (m, 1H,  $\text{CH}_a\text{H}_b$ ), 3.03-3.10 (m, 1H,  $\text{CH}$ ), 3.36-3.47 (m, 2H,  $\text{CH}_2$ ), 3.56 (t, 2H,  $\text{CH}_2$ ,  $J$  9.2 Hz), 6.60 (d, 2H,  $2 \times \text{Ar-CH}$ ,  $J$  8.2 Hz), 6.75 (t, 1H,  $\text{Ar-CH}$ ,  $J$  7.3 Hz), 7.26 (app t, 2H,  $2 \times \text{Ar-CH}$ ,  $J$  8.0 Hz); **<sup>13</sup>C NMR** ( $\text{CDCl}_3$ , 125 MHz)  $\delta_{\text{C}}$  25.3 (q,  $\text{CH}_2$ ,  $J_{\text{F}}$  2.5 Hz), 42.4 (q,  $\text{CH}$ ,  $J_{\text{F}}$  28.4 Hz), 47.1 ( $\text{CH}_2$ ), 47.4 (q,  $\text{CH}_2$ ,  $J_{\text{F}}$  2.9 Hz), 112.3 ( $2 \times \text{Ar-CH}$ ), 116.9 ( $\text{Ar-CH}$ ), 127.4 (q,  $\text{CF}_3$ ,  $J_{\text{F}}$  277.3 Hz), 129.4 ( $2 \times \text{Ar-CH}$ ), 147.4 ( $\text{C}_{\text{quat}}$ ); **<sup>19</sup>F NMR** ( $\text{CDCl}_3$ , 564 MHz)  $\delta_{\text{F}}$  - 71.23 (d,  $\text{CF}_3$ ,  $J_{\text{H}}$  8.9 Hz); ***m/z***

<sup>4</sup> Y.-Y. Yu, A. R. Ranade, G. I. Georg, *Adv. Synth. Catal.* **2014**, 356, 3510–3518

<sup>5</sup> K. Monir, A. K. Bagdi, M. Ghosh, A. Haajra, *J. Org. Chem.*, **2015**, 80, 1332-1337

<sup>6</sup> L. Cui, Y. Matusaki, N. Tada, T. Miura, B. Uno, A. Itoh, *Adv. Synth. Catal.* **2013**, 355, 2203–2207

(EI) 126 ( $[M + H]^+$ , 10%), 214 ( $[M - H_2 + H]^+$ , 100%). **HRMS** (ESI): calc. for  $[C_{11}H_{13}NF_3]$  216.0995, measured 216.0994.

### 3. $^1\text{H}$ , $^{13}\text{C}$ and $^{19}\text{F}$ NMR spectra of new compounds

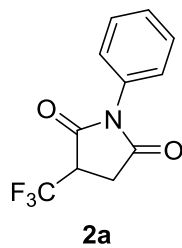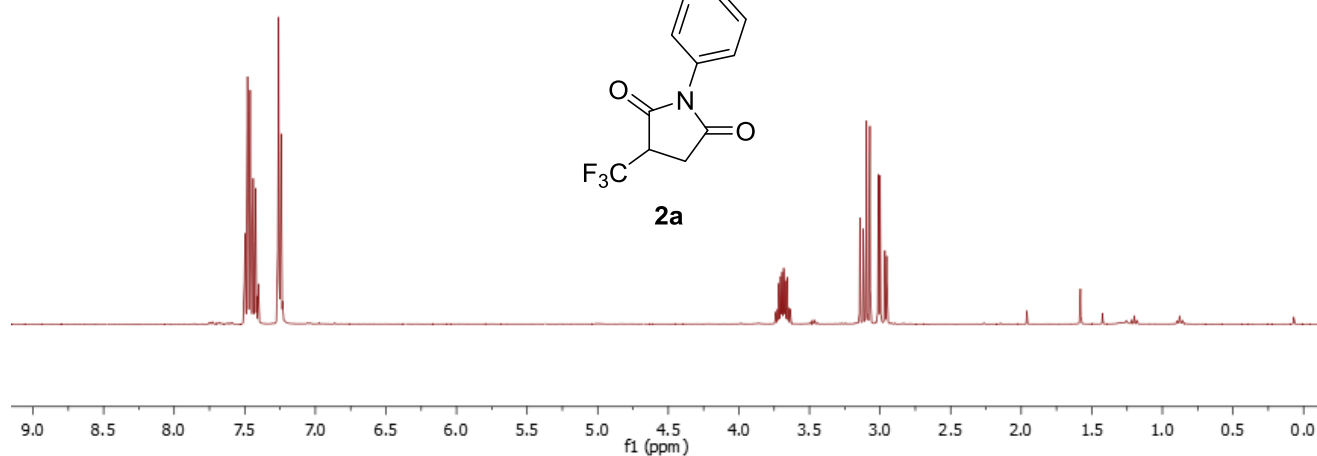

**$^1\text{H}$  NMR spectrum of 1-phenyl-3-(trifluoromethyl)pyrrolidine-2,5-dione 2a**

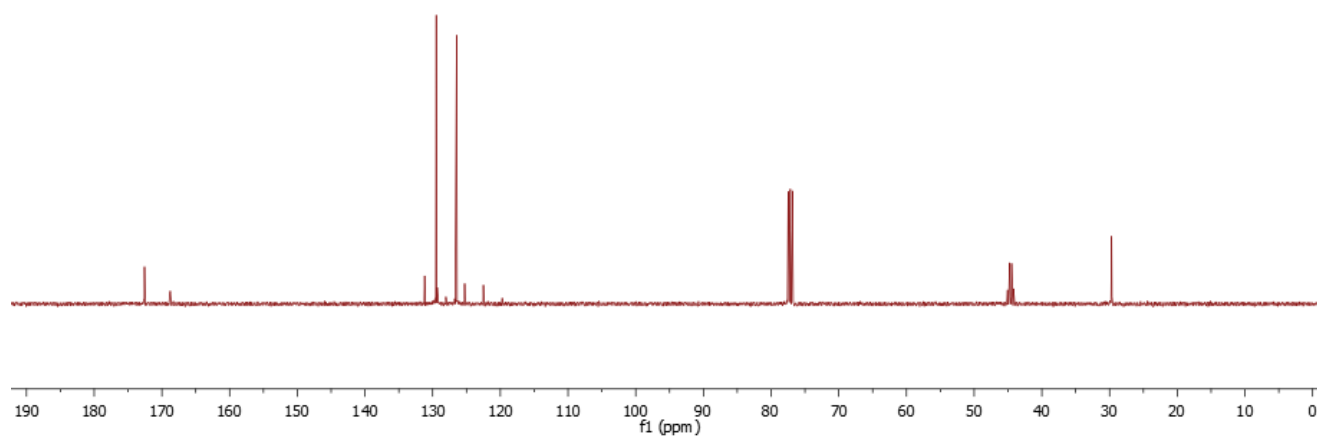

**$^{13}\text{C}$  NMR spectrum of 1-phenyl-3-(trifluoromethyl)pyrrolidine-2,5-dione 2a**

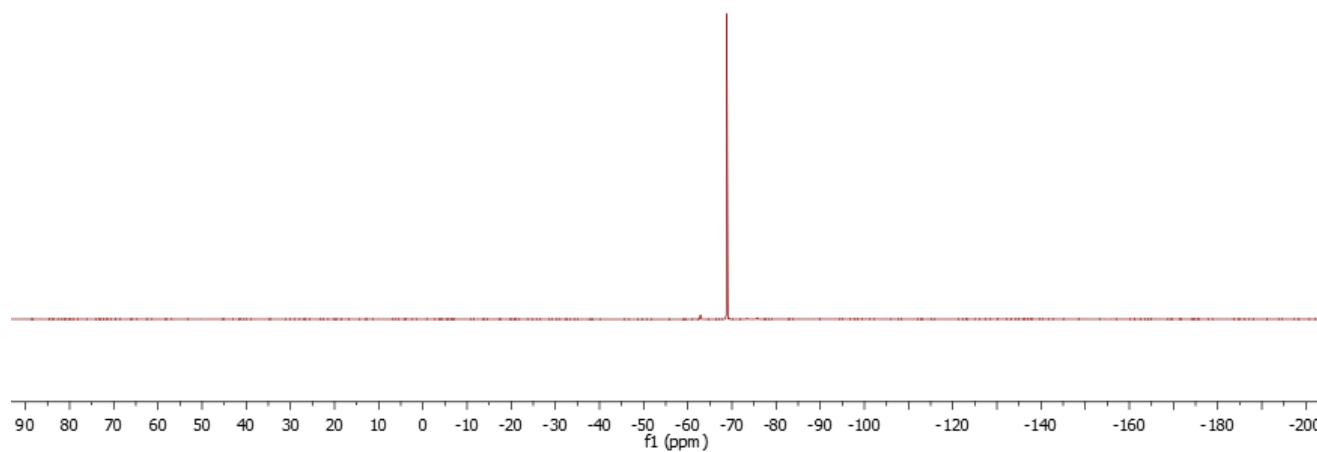

**$^{19}\text{F}$  NMR spectrum of 1-phenyl-3-(trifluoromethyl)pyrrolidine-2,5-dione 2a**

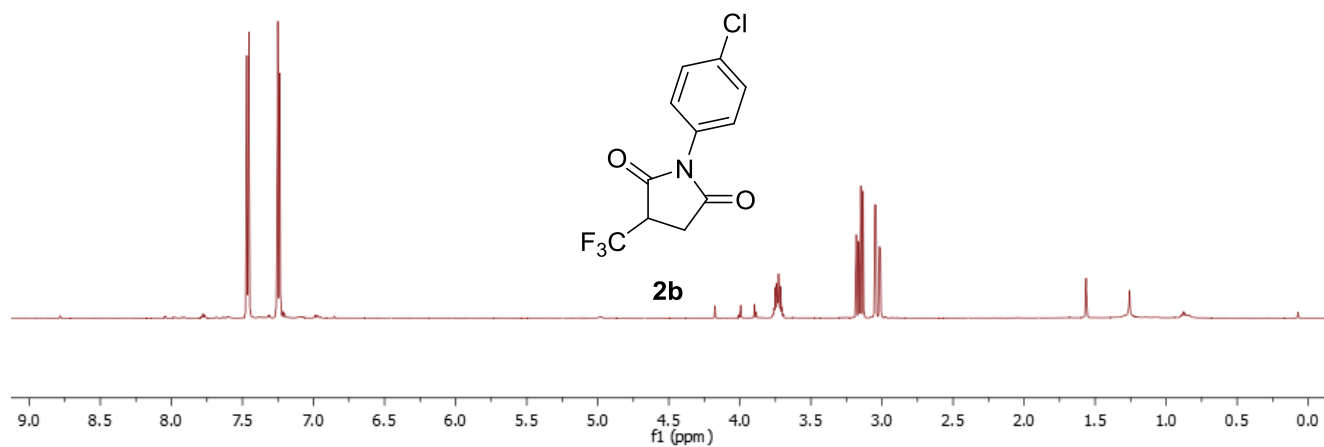

**<sup>1</sup>H NMR spectrum of 1-(*p*-chlorophenyl)-3-(trifluoromethyl)pyrrolidine-2,5-dione 2b**

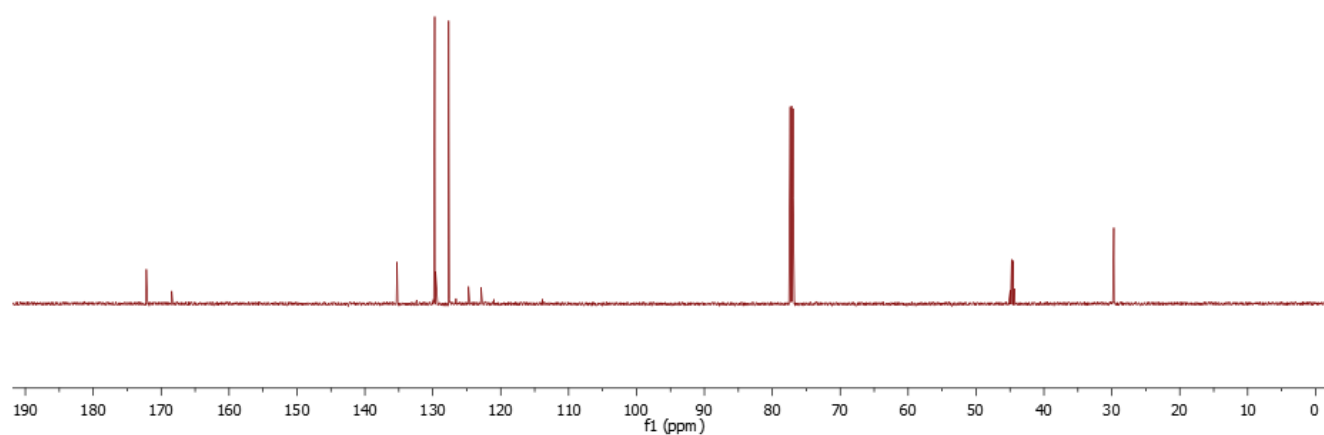

**<sup>13</sup>C NMR spectrum of 1-(*p*-chlorophenyl)-3-(trifluoromethyl)pyrrolidine-2,5-dione 2b**

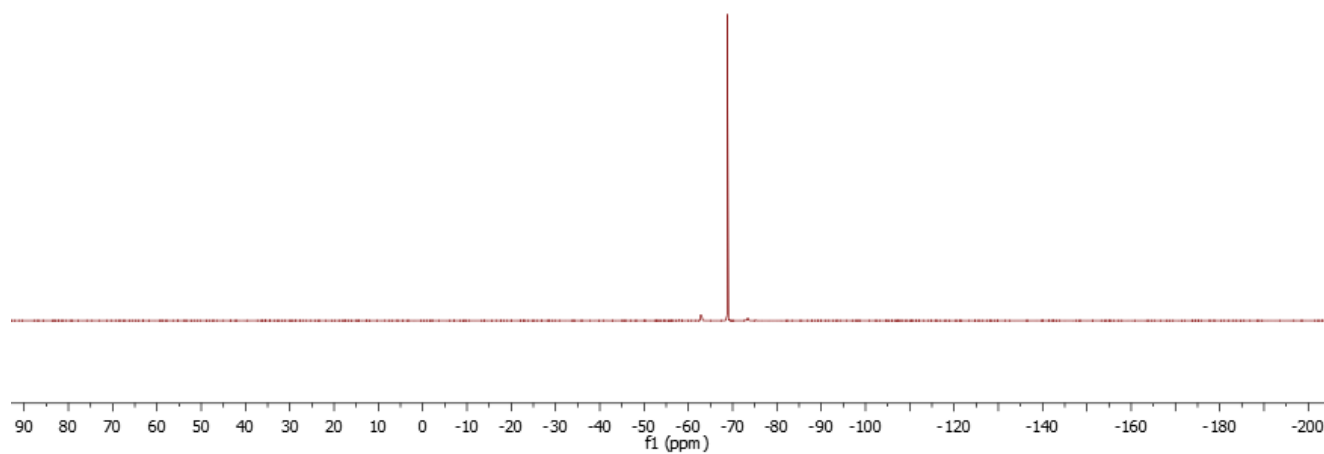

**<sup>19</sup>F NMR spectrum of 1-(*p*-chlorophenyl)-3-(trifluoromethyl)pyrrolidine-2,5-dione 2b**

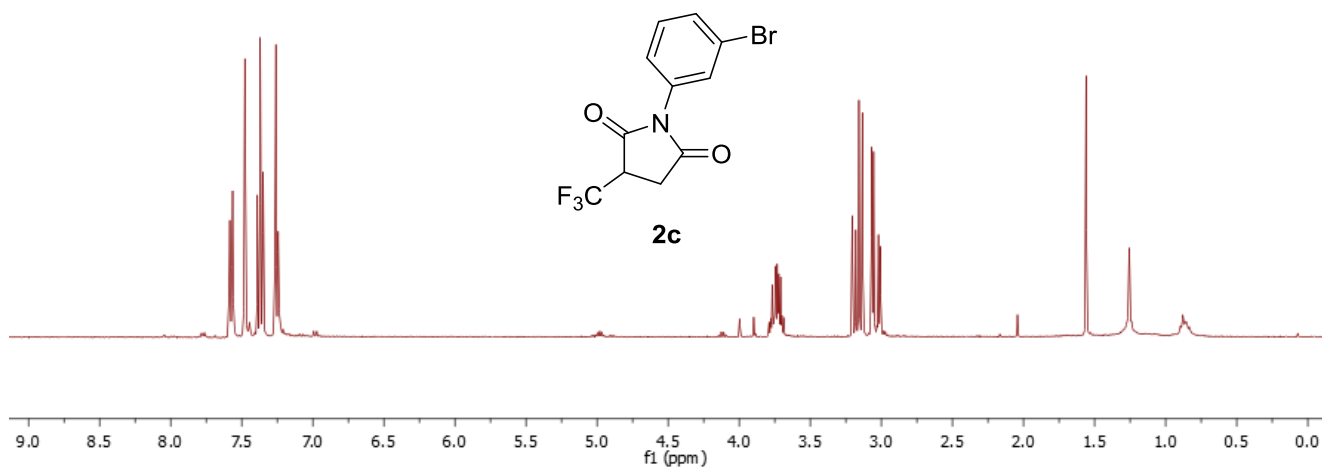

**<sup>1</sup>H NMR spectrum of 1-(*m*-bromophenyl)-3-(trifluoromethyl)pyrrolidine-2,5-dione 2c**

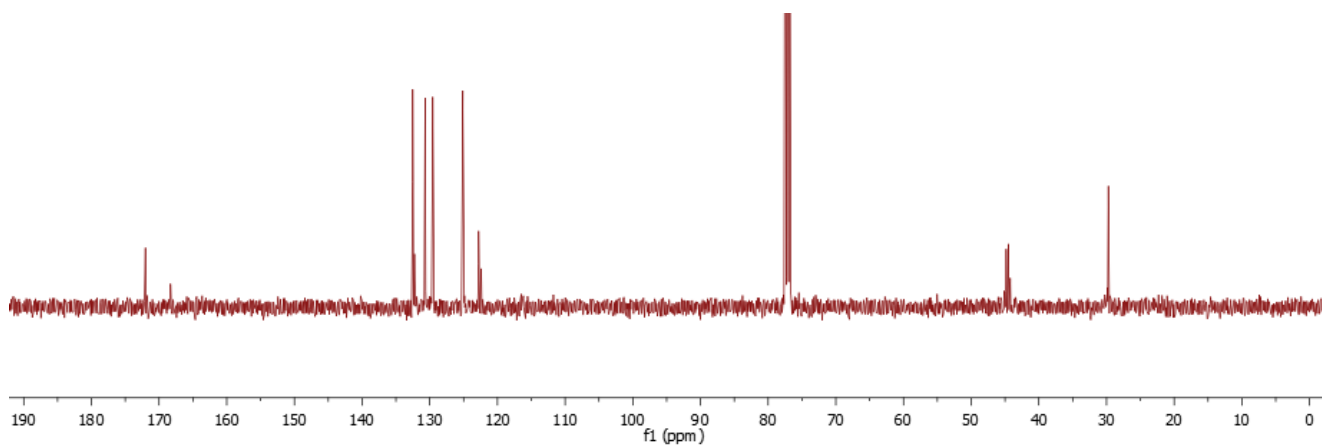

**<sup>13</sup>C NMR spectrum of 1-(*m*-bromophenyl)-3-(trifluoromethyl)pyrrolidine-2,5-dione 2c**

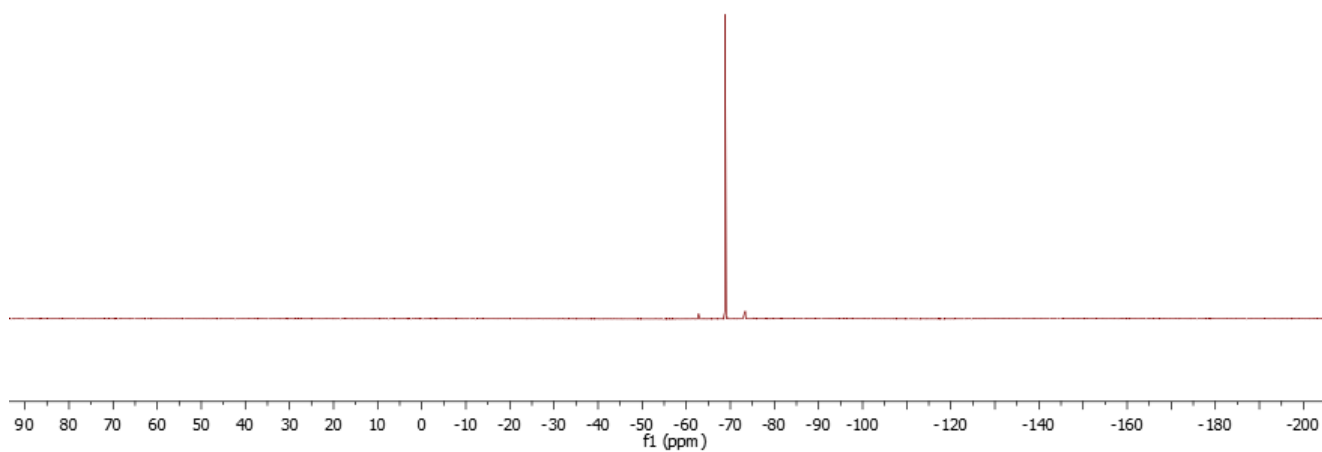

**<sup>19</sup>F NMR spectrum of 1-(*m*-bromophenyl)-3-(trifluoromethyl)pyrrolidine-2,5-dione 2c**

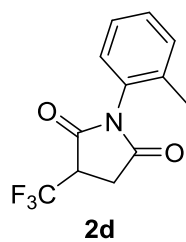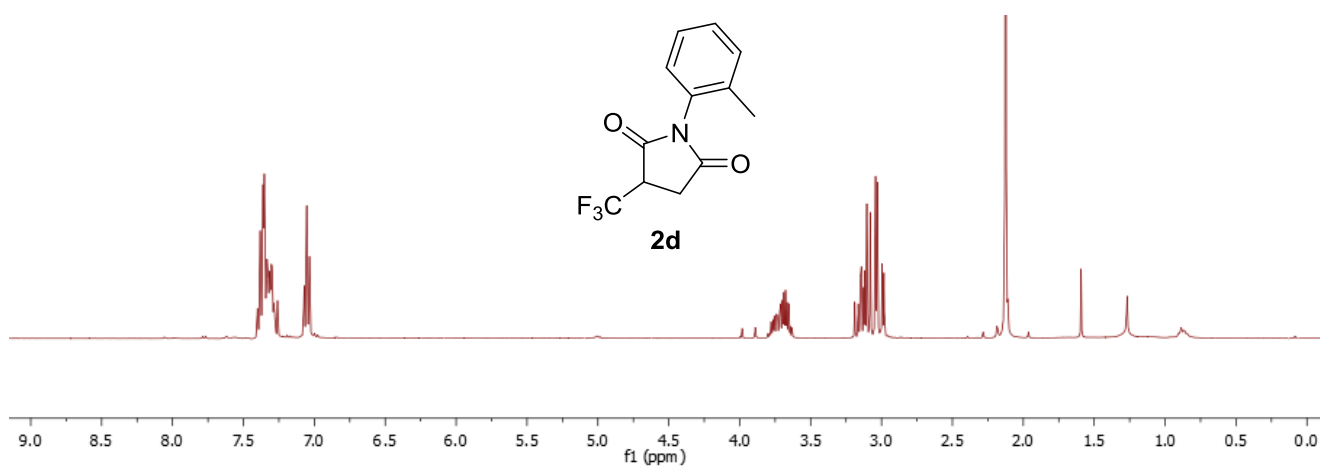

**<sup>1</sup>H NMR spectrum of 1-(*o*-tolyl)-3-(trifluoromethyl)pyrrolidine-2,5-dione **2d****

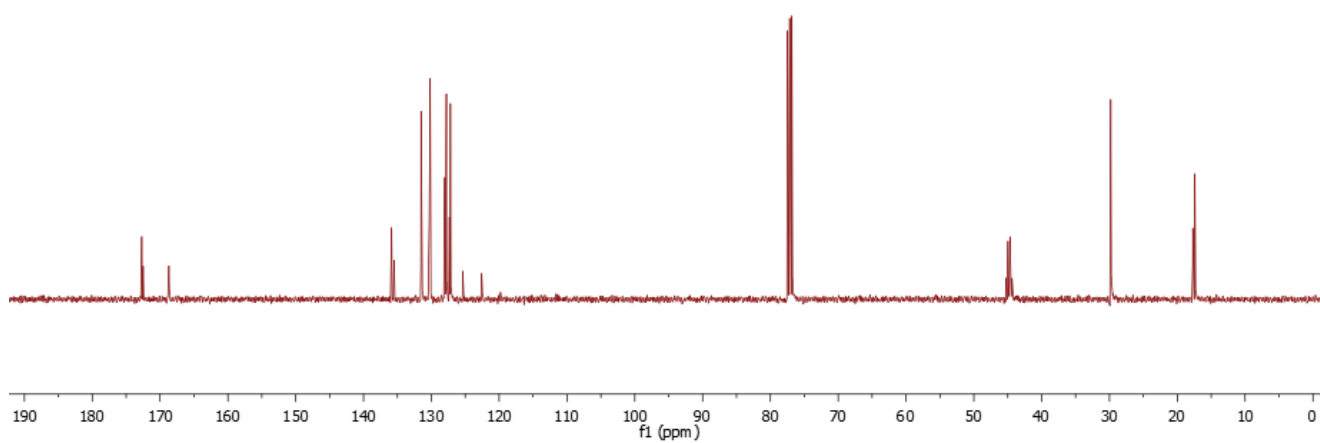

**<sup>13</sup>C NMR spectrum of 1-(*o*-tolyl)-3-(trifluoromethyl)pyrrolidine-2,5-dione **2d****

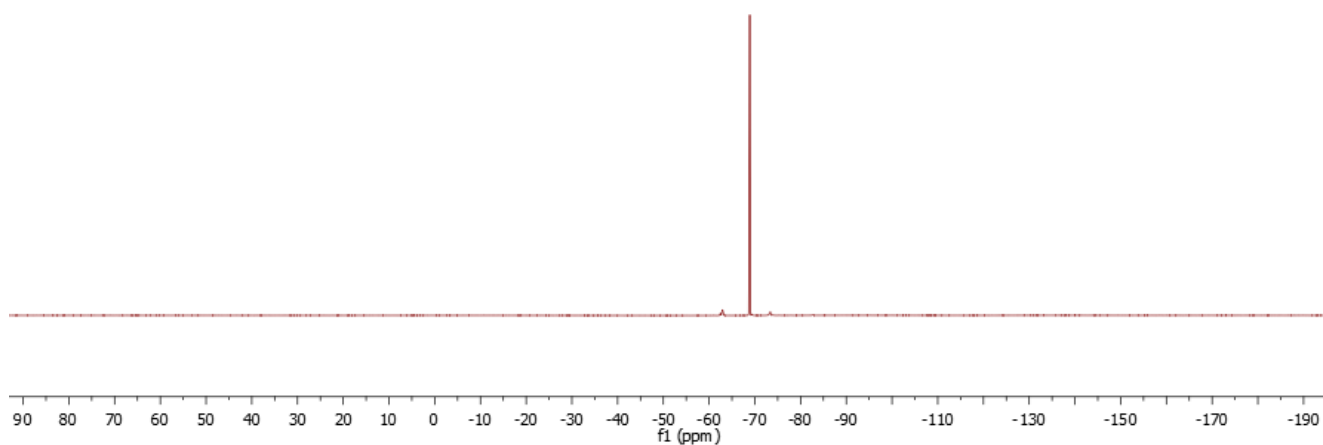

**<sup>19</sup>F NMR spectrum of 1-(*o*-tolyl)-3-(trifluoromethyl)pyrrolidine-2,5-dione **2d****

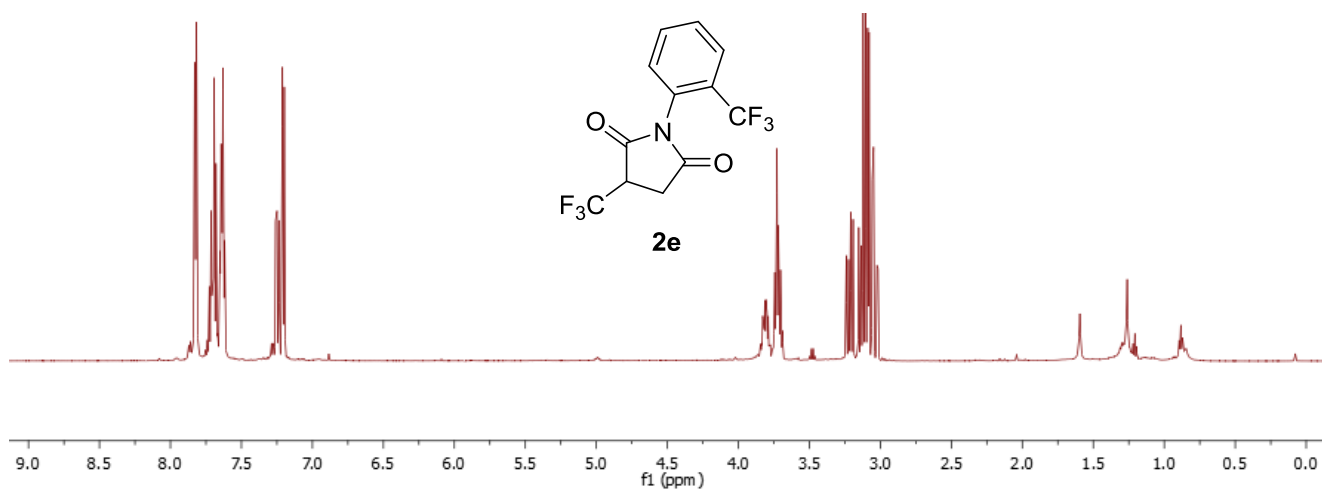

**<sup>1</sup>H NMR spectrum of 1-(*o*-trifluoromethylphenyl)-3-(trifluoromethyl)pyrrolidine-2,5-dione 2e**

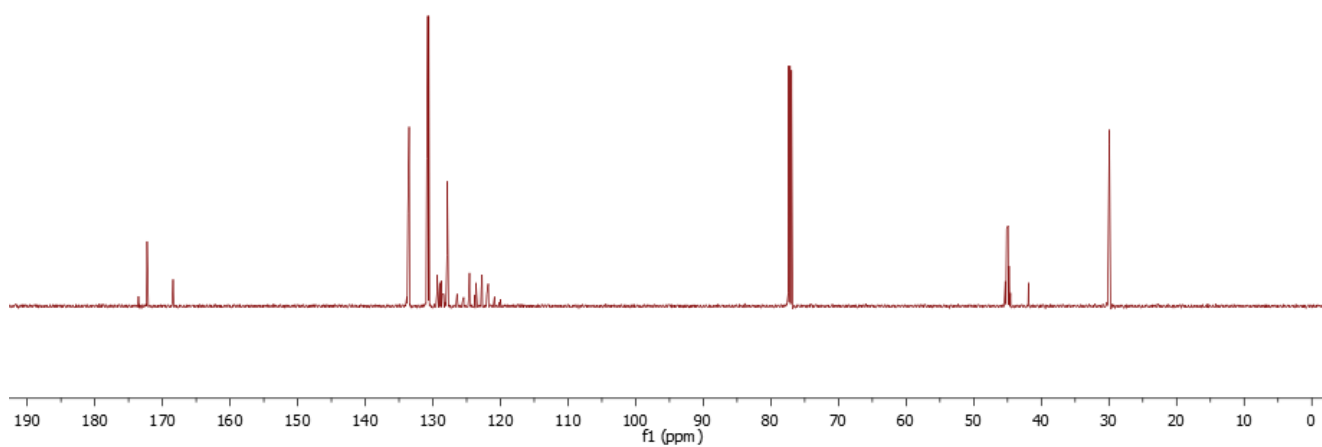

**<sup>13</sup>C NMR spectrum of 1-(*o*-trifluoromethylphenyl)-3-(trifluoromethyl)pyrrolidine-2,5-dione 2e**

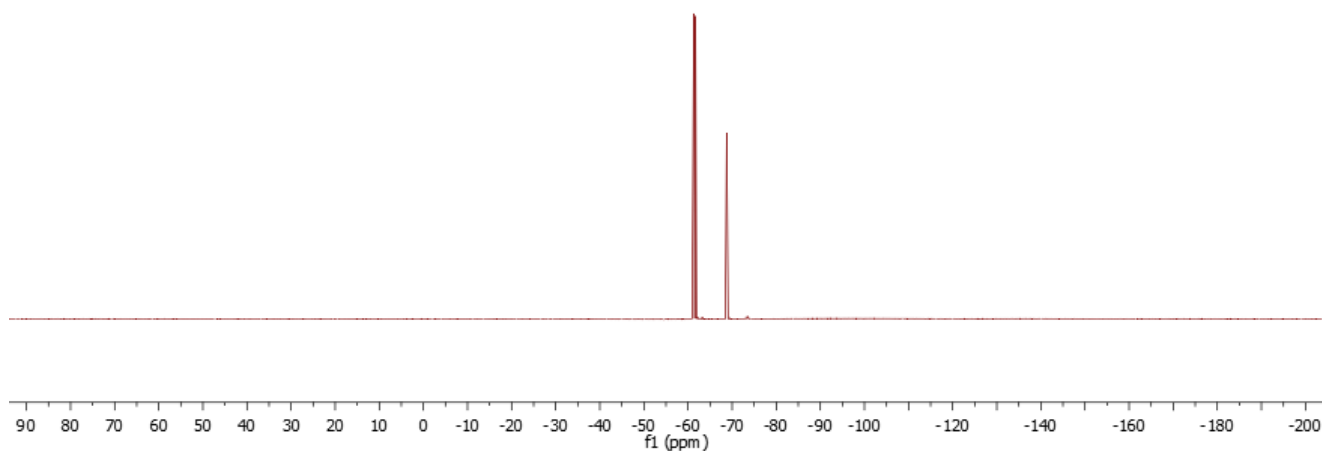

**<sup>19</sup>F NMR spectrum of 1-(*o*-trifluoromethylphenyl)-3-(trifluoromethyl)pyrrolidine-2,5-dione 2e**



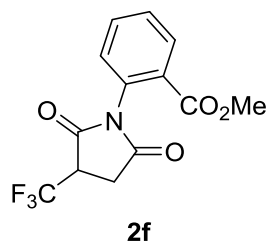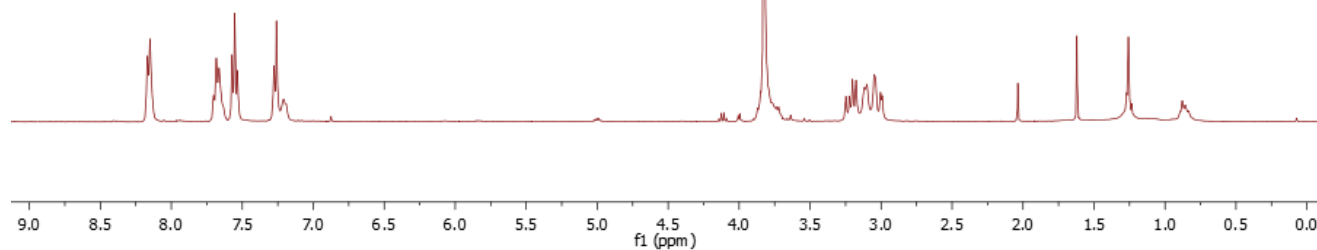

**<sup>1</sup>H NMR spectrum of Methyl *o*-(2,5-dioxo-3-(trifluoromethyl)pyrrolidin-1-yl)benzoate **2f****

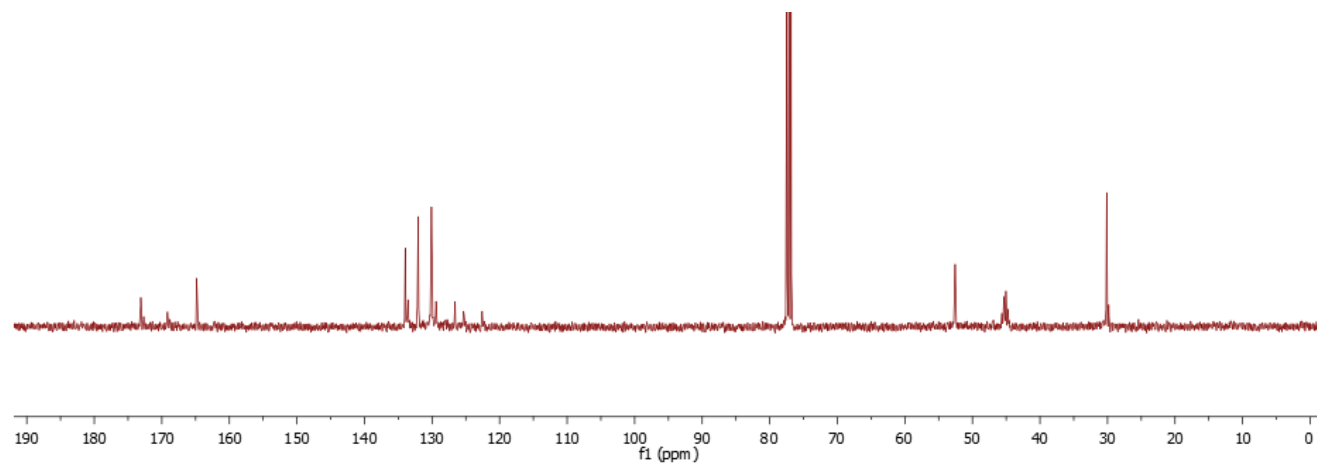

**<sup>13</sup>C NMR spectrum of Methyl *o*-(2,5-dioxo-3-(trifluoromethyl)pyrrolidin-1-yl)benzoate **2f****

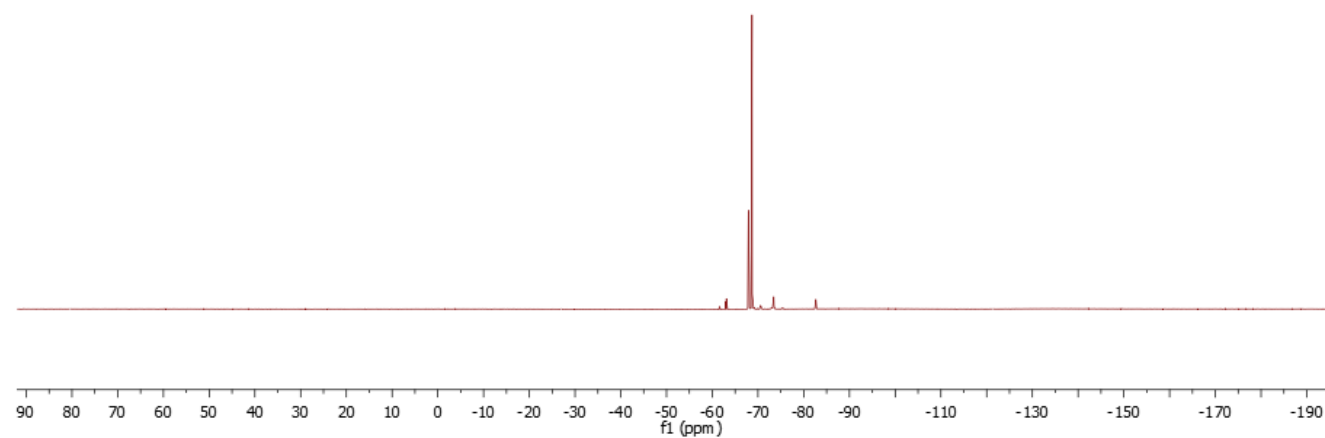

**<sup>19</sup>F NMR spectrum of Methyl *o*-(2,5-dioxo-3-(trifluoromethyl)pyrrolidin-1-yl)benzoate **2f****

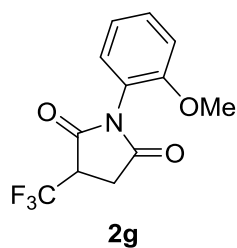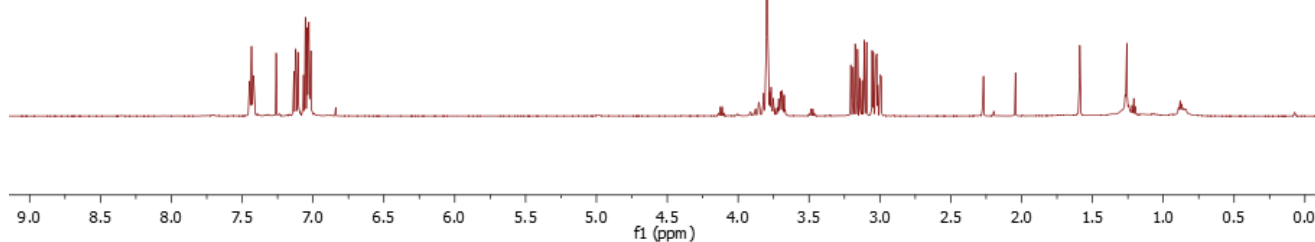

**<sup>1</sup>H NMR spectrum of 1-(*o*-methoxyphenyl)-3-(trifluoromethyl)pyrrolidine-2,5-dione 2g**

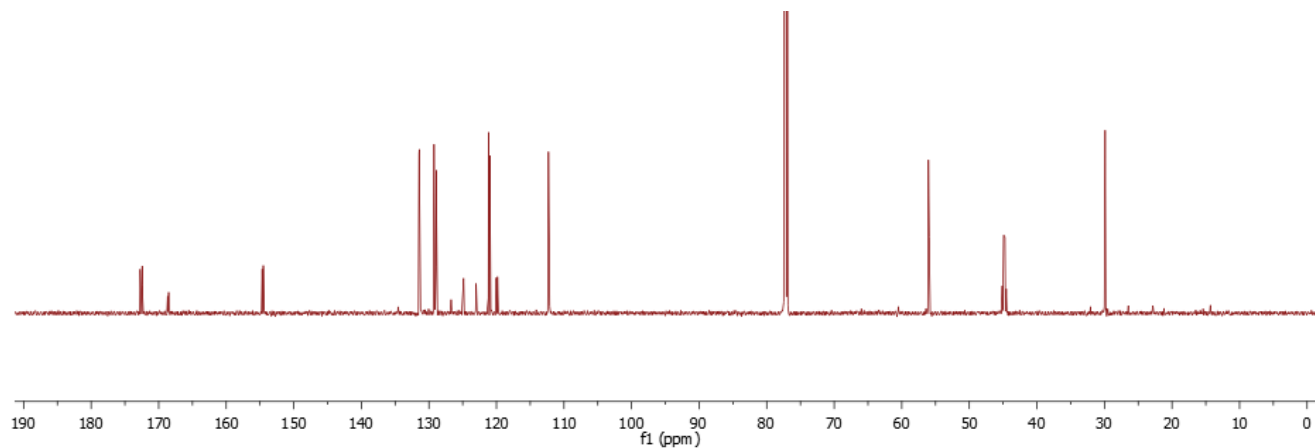

**<sup>13</sup>C NMR spectrum of 1-(*o*-methoxyphenyl)-3-(trifluoromethyl)pyrrolidine-2,5-dione 2g**

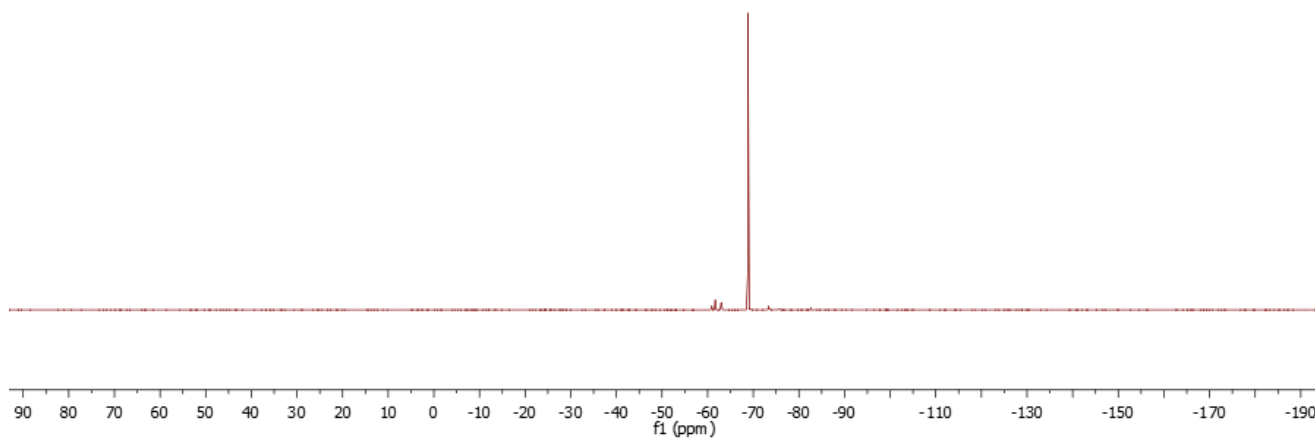

**<sup>19</sup>F NMR spectrum of 1-(*o*-methoxyphenyl)-3-(trifluoromethyl)pyrrolidine-2,5-dione 2g**

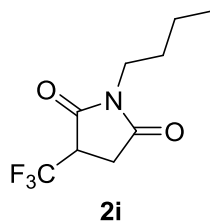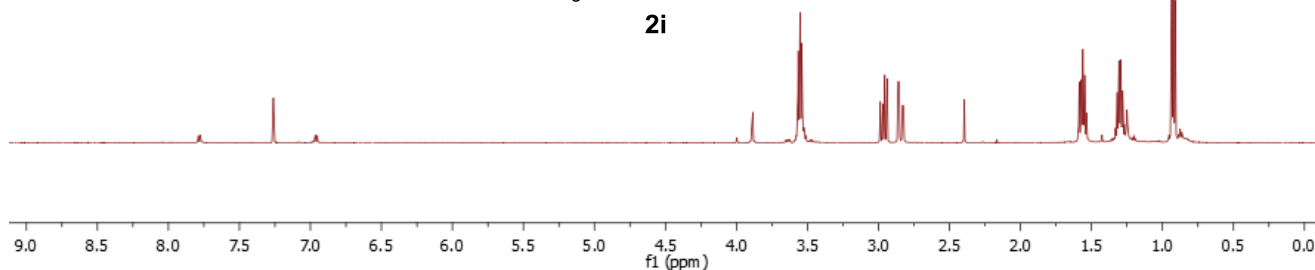

**<sup>1</sup>H NMR spectrum of 1-butyl-3-(trifluoromethyl)pyrrolidine-2,5-dione 2i with 3% 4,4'-dimethoxybenzophenone**

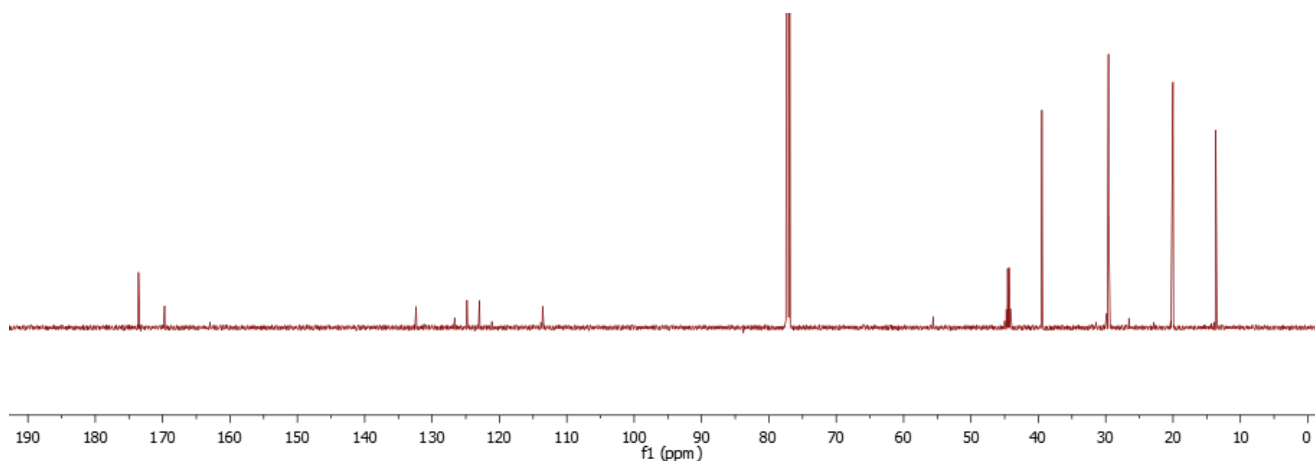

**<sup>13</sup>C NMR spectrum of 1-butyl-3-(trifluoromethyl)pyrrolidine-2,5-dione 2i with 3% 4,4'-dimethoxybenzophenone**

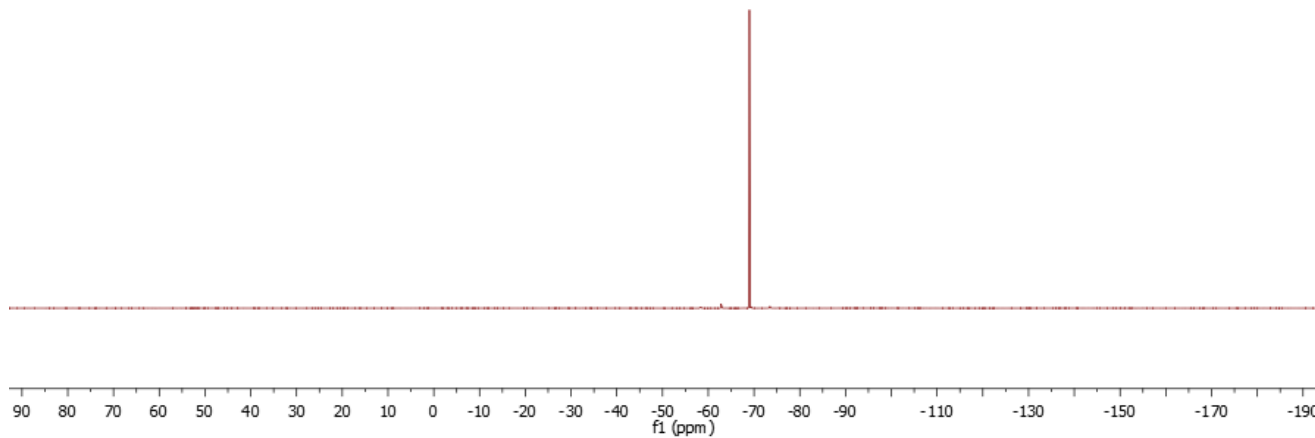

**<sup>19</sup>F NMR spectrum of 1-butyl-3-(trifluoromethyl)pyrrolidine-2,5-dione 2i with 3% 4,4'-dimethoxybenzophenone**

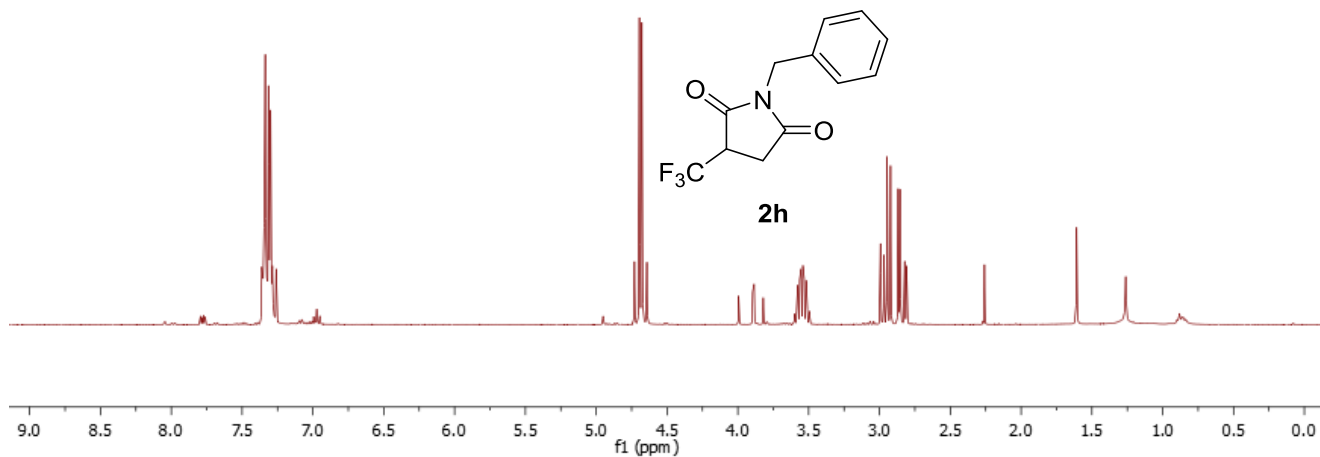

**<sup>1</sup>H NMR spectrum of 1-benzyl-3-(trifluoromethyl)pyrrolidine-2,5-dione 2j**

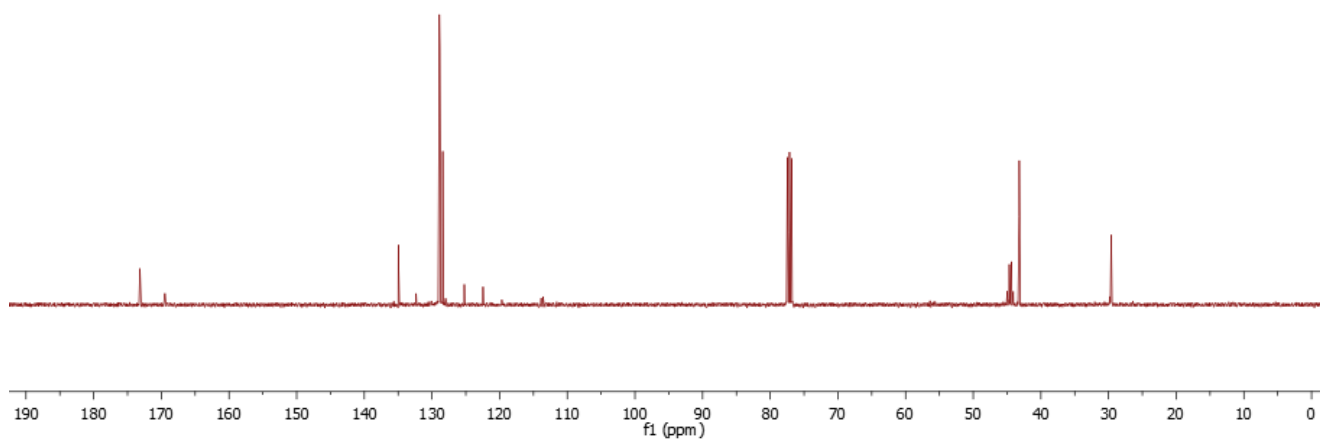

**<sup>13</sup>C NMR spectrum of 1-benzyl-3-(trifluoromethyl)pyrrolidine-2,5-dione 2j**

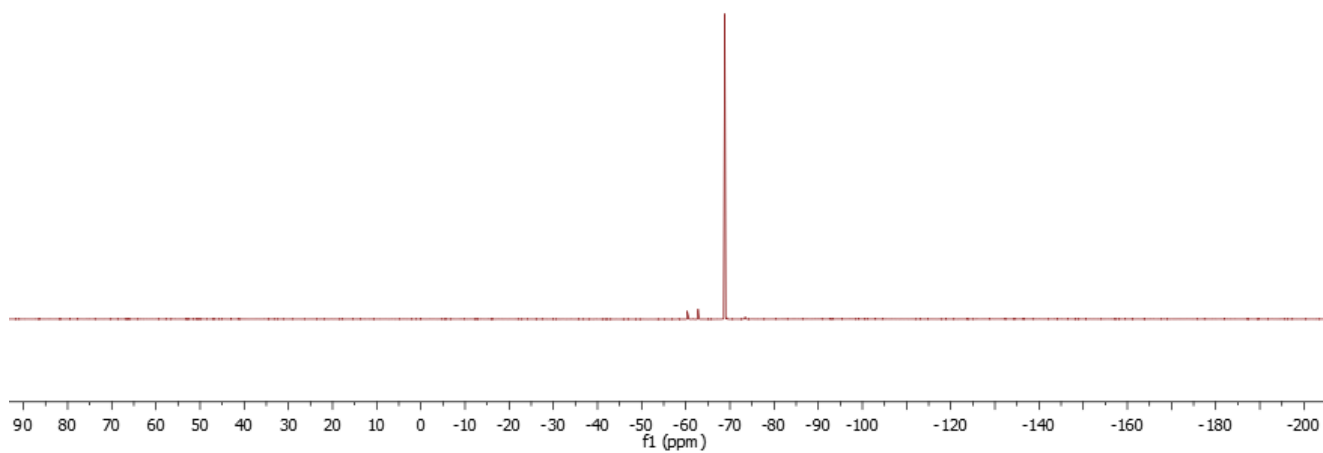

**<sup>19</sup>F NMR spectrum of 1-benzyl-3-(trifluoromethyl)pyrrolidine-2,5-dione 2j**

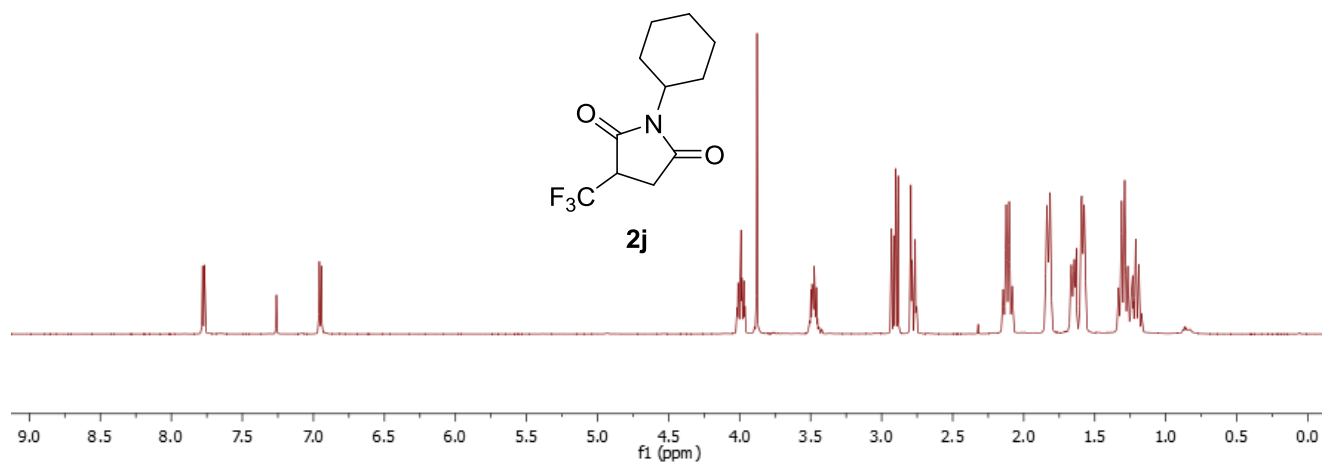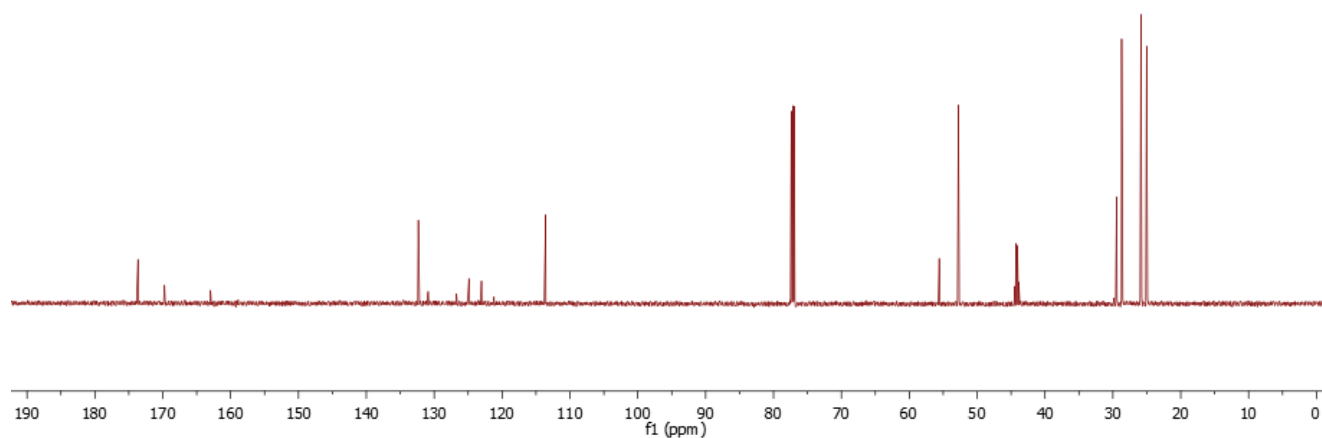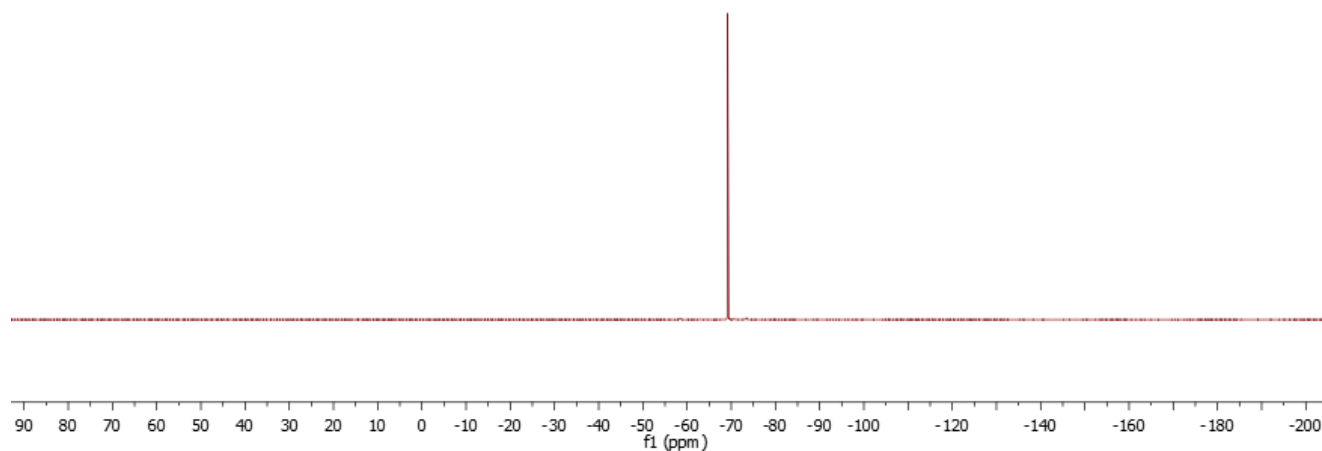

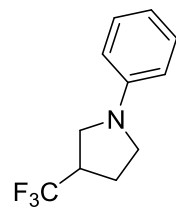

**3a**

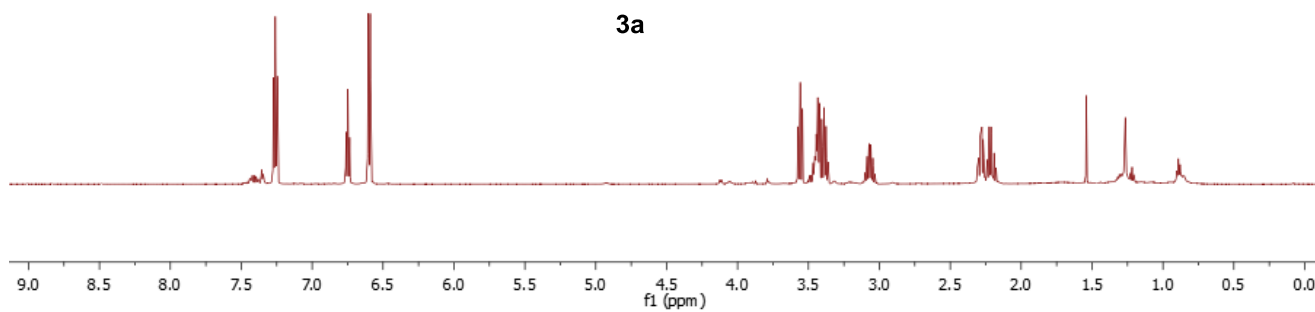

**$^1H$  NMR spectrum of 1-phenyl-3-(trifluoromethyl)pyrrolidine 3a**

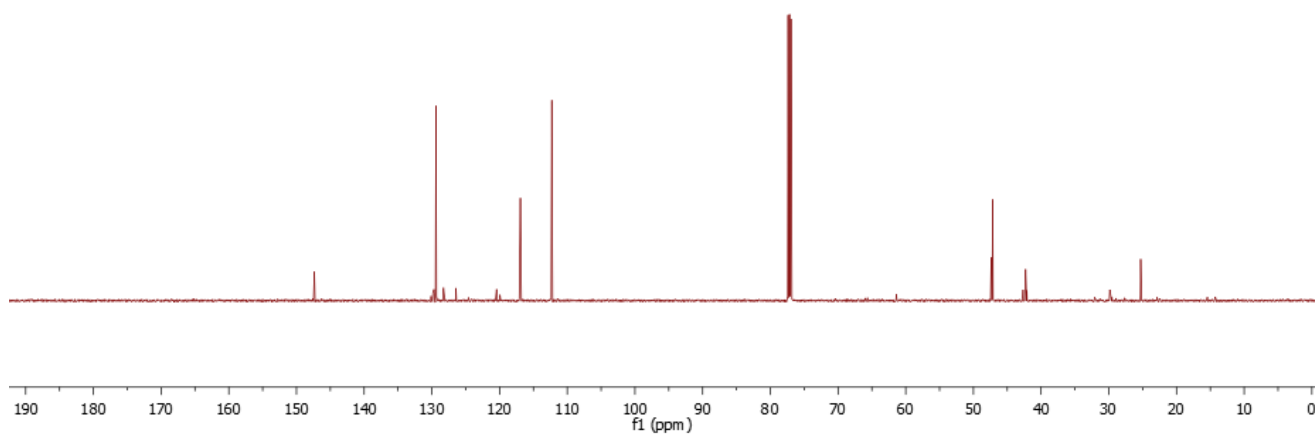

**$^{13}C$  NMR spectrum of 1-phenyl-3-(trifluoromethyl)pyrrolidine 3a**

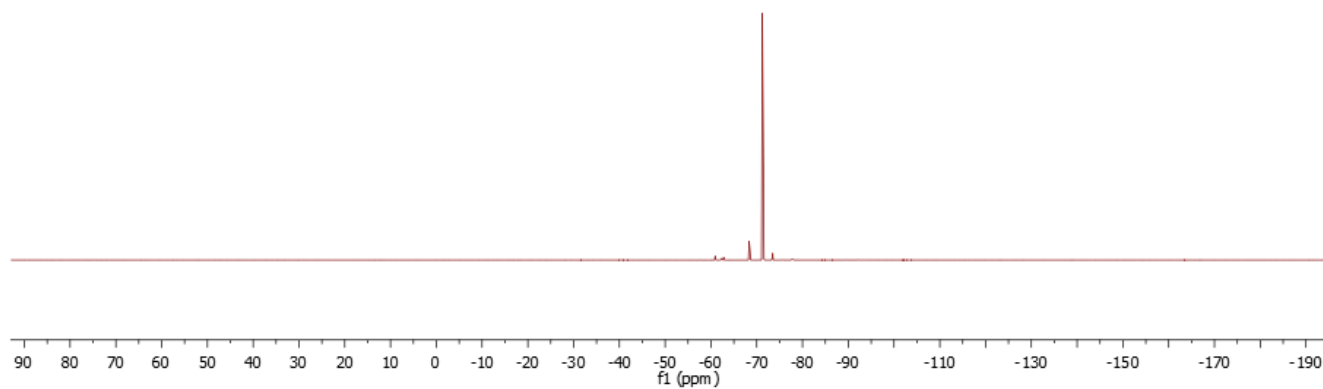

**$^{19}F$  NMR spectrum of 1-phenyl-3-(trifluoromethyl)pyrrolidine 3a**
